# Supplementary material
Source: PubMed Central journal article supplement (PMC10275692)
Supplement: NIHMS1897889-supplement-Online_supplementary_material.pdf [file NIHMS1897889-supplement-Online_supplementary_material.pdf]

**APPENDIX**

**Appendix 1 - Coverage for buprenorphine products in Medicaid, Medicare Advantage, and commercial formularies, 2017-2021.**

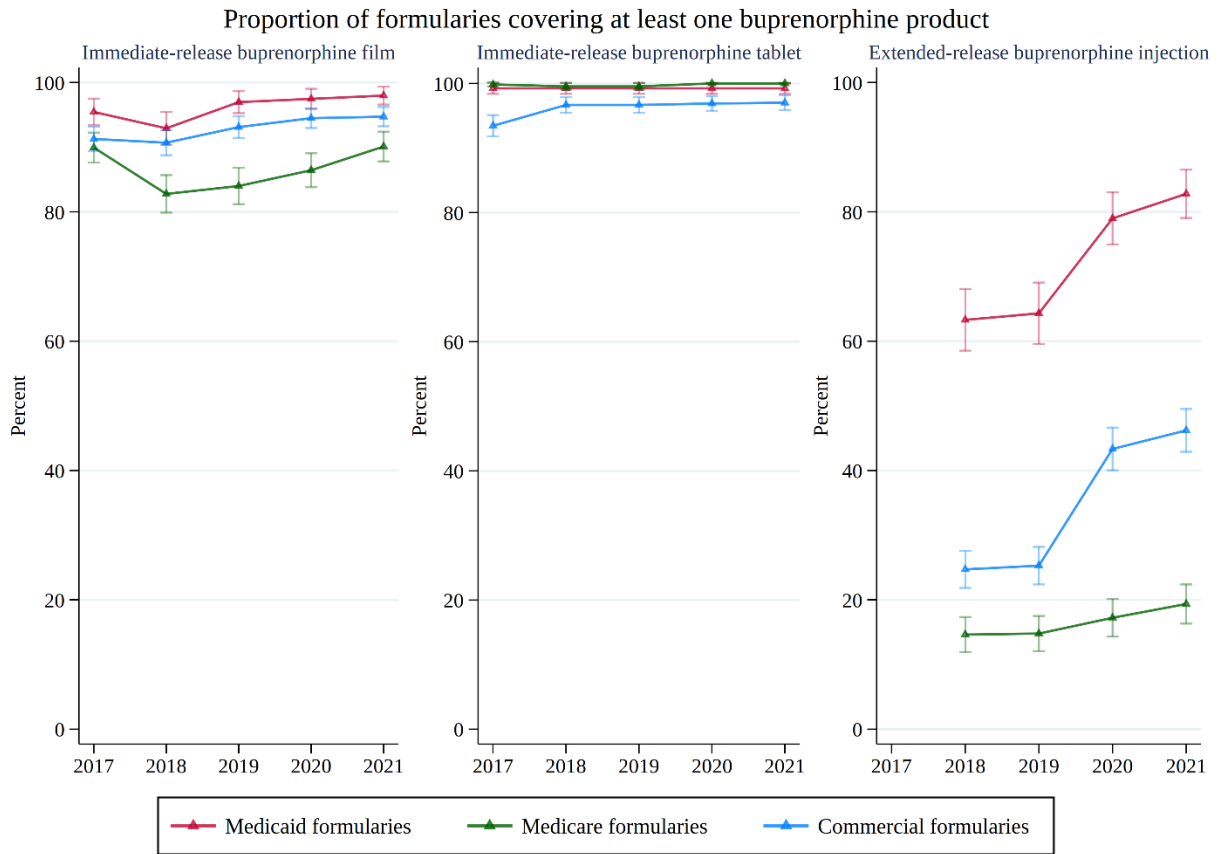

SOURCE [Authors analysis of data derive from 395 Medicaid formularies, 656 Medicare Advantage formularies, and 870 commercial formularies included in the Ideon database throughout 2017-2021.] NOTES [The bars present the 95% confidence intervals for the proportions].

**Appendix 2 - Prior authorization requirements for buprenorphine products in Medicaid, Medicare Advantage, and commercial formularies, 2017-2021.**

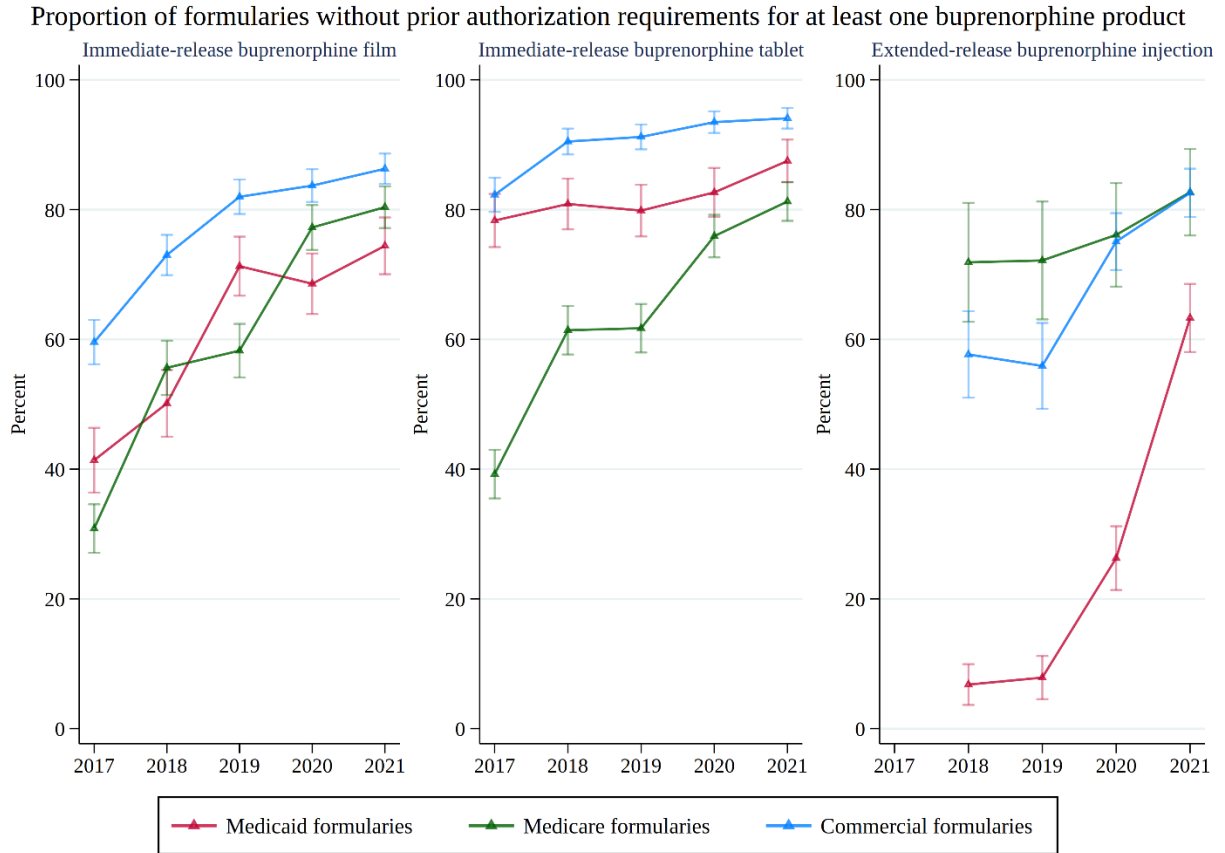

SOURCE [Authors analysis of data derive from 395 Medicaid formularies, 656 Medicare Advantage formularies, and 870 commercial formularies included in the Ideon database throughout 2017-2021.] NOTES [The denominators for the proportions are the numbers of formularies that covered at least one immediate-release buprenorphine product and the number that covered extended-release buprenorphine injection. The bars present the 95% confidence intervals for the proportions].

**Appendix 3 – Quantity limits for buprenorphine products in Medicaid, Medicare Advantage, and commercial formularies, 2017-2021.**

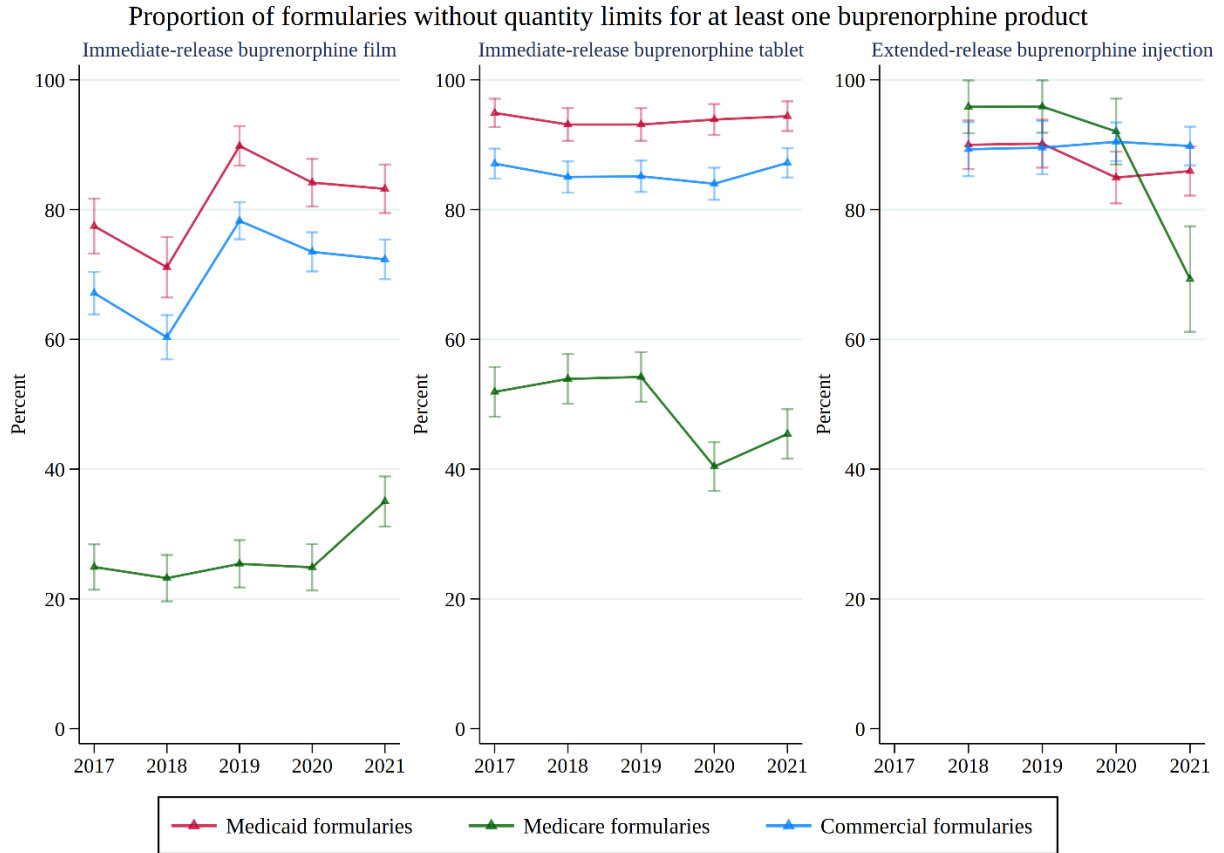

SOURCE [Authors analysis of data derive from 395 Medicaid formularies, 656 Medicare Advantage formularies, and 870 commercial formularies included in the Ideon database throughout 2017-2021.] NOTES [The denominators for the proportions are the numbers of formularies that covered at least one immediate-release buprenorphine product and the number that covered extended-release buprenorphine injection. The bars present the 95% confidence intervals for the proportions].

## Appendix 4 - Names of formularies included in the sample

To provide readers with context on the nature of our sample, the full list of 1921 formularies in this study is listed below.

| <b>395 MEDICAID FORMULARIES</b>        | <b>State</b> | <b>656 MEDICARE ADVANTAGE FORMULARIES</b>                                       | <b>870 COMMERCIAL FORMULARIES</b>                    |
|----------------------------------------|--------------|---------------------------------------------------------------------------------|------------------------------------------------------|
| Advicare Medicaid Formulary            |              | AARP Medicare Rx Walgreens                                                      | 4-D Management Systems                               |
| Aetna Better Health Illinois           | Illinois     | AARP Medicare Complete Choice/Choice Regional/ Plan1 & 2/ Plan 2 Regional       | Advanced Control Formulary for Teachers Health Trust |
| Aetna Better Health Illinois FHP/ACA   | Illinois     | AARP Medicare Complete Mosaic                                                   | Adventist Health                                     |
| Aetna Better Health of Kentucky        | Kentucky     | AARP Medicare Complete Plan 1-8                                                 | Aetna 5 Tier HIX                                     |
| Aetna Better Health of Louisiana       | Louisiana    | AARP Medicare Complete Plus/ Plan 1 & 2                                         | Aetna Commercial Fully Insured 2 Tier Closed         |
| Aetna Better Health of Michigan        | Michigan     | AARP Medicare Complete Secure Horizons Plan 3                                   | Aetna Commercial Fully Insured 2 Tier Open           |
| Aetna Better Health of MO              | Missouri     | AARP Medicare Complete Secure Horizons/Secure Horizons Plan 1,2,4/Premier/Value | Aetna Commercial Fully Insured 3 Tier                |
| Aetna Better Health of Nebraska        | Nebraska     | AARP Medicare Complete/Access/Focus/Premier/Profile/Value                       | Aetna Commercial Fully Insured 4 Tier                |
| Aetna Better Health of New Jersey      | New Jersey   | AARP Medicare Rx Preferred                                                      | Aetna Commercial Fully Insured 5 Tier                |
| Aetna Better Health of Texas CHIP      | Texas        | AARP Medicare Rx Saver Plus                                                     | Aetna Commercial Self Insured 2 Tier Closed          |
| Aetna Better Health of Virginia        | Virginia     | AARP Medicare Rx Saver Plus FL-NY                                               | Aetna Commercial Self Insured 2 Tier Open            |
| Aetna Better Health Pennsylvania       | Pennsylvania | AARP Medicare Rx Walgreens FL NY                                                | Aetna Commercial Self Insured 3 Tier                 |
| Aetna Better Health Texas STAR         | Texas        | Absolute Total Care                                                             | Aetna Commercial Self Insured 4 Tier                 |
| Affinity Health Plan Child Health Plus |              | Absolute Total Care MMP                                                         | Aetna Commercial Self Insured 5 Tier                 |
| Affinity Health Plan Managed Medicaid  |              | Access Medicare                                                                 | Aetna HIX Florida                                    |
| Alabama State Medicaid                 | Alabama      | Access Medicare Pearl                                                           | Aetna Innovation Health Leap HIX                     |
| Alameda Alliance for Health Group Care |              | Advantage Health Solutions 4 Tier with Specialty                                | Aetna Leap HIX                                       |
| Alameda Alliance for Health Medi-Cal   |              | Advantage-Plus Meridian                                                         | Aetna Premier 2 Tier                                 |
| Alaska State Medicaid                  | Alaska       | Advicare Advocate MMP                                                           | Aetna Premier 3 Tier                                 |
| AllCare (OHP)                          |              | Aetna Better Health FIDA Plan                                                   | Aetna Premier 4 Tier                                 |
| AlphaCare of New York                  | New York     | Aetna Better Health IL Premier Plan MMP                                         | Aetna Premier 5 Tier                                 |
| Amerigroup Community Care Georgia      | Georgia      | Aetna Better Health MI Premier Plan MMP                                         | Aetna Premier Plus 2 Tier                            |
| Amerigroup Community Care Louisiana    | Louisiana    | Aetna Better Health MyCare Ohio MMP                                             | Aetna Premier Plus 3 Tier                            |
| Amerigroup Community Care Maryland     | Maryland     | Aetna Medicare B1 Formulary                                                     | Aetna Premier Plus 4 Tier                            |
| Amerigroup Community Care Nevada       | Nevada       | Aetna Medicare B2 Formulary                                                     | Aetna Premier Plus 5 Tier                            |
| Amerigroup Community Care New Jersey   | New Jersey   | Aetna Medicare B3 Formulary                                                     | Aetna Value 2 Tier Closed                            |
| Amerigroup Community Care Tennessee    | Tennessee    | Aetna Medicare B4 Formulary                                                     | Aetna Value 2 Tier Open                              |
| Amerigroup Florida Healthy Kids        | Florida      | Aetna Medicare B5 Formulary                                                     | Aetna Value 3 Tier                                   |
| Amerigroup Florida MMA                 | Florida      | Aetna Medicare Formulary A1                                                     | Aetna Value 4 Tier                                   |
| Amerigroup Iowa Health Link            | Iowa         | AFC Care Rx/AFC Special Care Rx                                                 | Aetna Value 5 Tier                                   |
| Amerigroup Kansas - KANCARE            | Kansas       | Affinity Medicare Ultimate/Solutions/Passport Plans                             | Aetna Value Plus 2 Tier                              |
| Amerigroup Texas STAR                  | Texas        | AgeRight Advantage Health Plan HMO-SNP                                          | Aetna Value Plus 3 Tier                              |
| Amerigroup Texas STAR+PLUS             | Texas        | AgeWell New York FIDA                                                           | Aetna Value Plus 4 Tier                              |
| Amerigroup TX CHIP                     | Texas        | AgeWell NY BeWell/FeelWell/CareWell                                             | Aetna Value Plus 5 Tier                              |

| <b>395 MEDICAID FORMULARIES</b>                   | <b>State</b>   | <b>656 MEDICARE ADVANTAGE FORMULARIES</b>                | <b>870 COMMERCIAL FORMULARIES</b>                         |
|---------------------------------------------------|----------------|----------------------------------------------------------|-----------------------------------------------------------|
| Amerigroup Washington Apple Health                | Washington     | AgeWell NY LiveWell                                      | Aetna Value Plus Small Group 3 Tier                       |
| Amida Care                                        |                | Akamai Advantage                                         | Aetna Value Plus Small Group 3 Tier NJ                    |
| Amida Care Plus                                   |                | Akamai Advantage Dual Care                               | Aetna Value Plus Small Group 4 Tier                       |
| Anthem BCBS BadgerCare Plus                       |                | Alignment Health Plan CalPlus Medicare                   | Aetna Value Plus Small Group 4 Tier MD and WV             |
| Anthem BlueCross BlueShield Kentucky Medicaid     | Kentucky       | Alignment Health Plan Medicare                           | Aetna Value Plus Small Group 5 Tier                       |
| Anthem BlueCross California Medicaid              | California     | AllCare Advantage                                        | Aetna Value Plus Small Group 5 Tier DE                    |
| Anthem Healthkeepers Plus                         |                | Allegian Advantage                                       | Aetna Value Plus Small Group 5 Tier FL                    |
| Anthem HIP Basic Plan                             |                | Aloha Care Quest                                         | Aetna Value Small Group 5 Tier                            |
| Anthem HIP Plus Plan                              |                | AlohaCare AdvantagePlus                                  | Affinity Essential Qualified Health Plan                  |
| Anthem HIP State Basic Plan                       |                | AlphaCare Signature FIDA Plan                            | AFSCME Council 31                                         |
| Anthem HIP State Plus Plan                        |                | Altius Health Plans B2 Formulary                         | Allegian Choice HIX                                       |
| Anthem Hoosier Care Connect                       | Indiana        | America's 1st Choice Insurance Company                   | Allegian Health Plans 4-Tier Closed                       |
| Anthem Indiana Hoosier Healthwise                 | Indiana        | Amerigroup STAR+PLUS MMP                                 | Alliant Energy 2 Tier                                     |
| Anthem SSI Medicaid                               |                | AmeriHealth 65 Preferred HMO                             | Alliant Energy 3 Tier                                     |
| Arbor Health Plan                                 |                | AmeriHealth Caritas District of Columbia                 | Alliant Health Plans 3 Tier Formulary                     |
| Arizona State Medicaid Fee For Service            | Arizona        | AmeriHealth Caritas Iowa Health Link                     | Alliant Health Plans Essential Health Benefits Formulary  |
| Arkansas Medicaid                                 | Arkansas       | AmeriHealth Caritas Louisiana                            | Alliant Plan Plus/Select 2 Tier                           |
| BCBS New Mexico Centennial Care                   | New Mexico     | AmeriHealth Caritas Pennsylvania                         | Ambetter from Buckeye Community Health Plan HIX OH        |
| BCBS of Minnesota Medicaid GenRx                  | Minnesota      | AmeriHealth Caritas VIP Care Plus MMP                    | Ambetter from CeltiCare Health Plan                       |
| BCBS of Montana Help Plan                         | Montana        | AmeriHealth Northeast                                    | Ambetter from Coordinated Care HIX                        |
| BCBS Tennessee Limited Formulary                  | Tennessee      | AmeriHealth VIP Care                                     | Ambetter from Magnolia Health Plan                        |
| BCBS Western New York Medicaid                    | New York       | Amerivantage ESRD - NJ                                   | Ambetter from MHS Health Wisconsin HIX                    |
| Better Health MMA                                 |                | Amerivantage ESRD- TX                                    | Ambetter from MHS Indiana HIX                             |
| Blue Cross and Blue Shield of Texas STAR          | Texas          | Amerivantage Medicare Advantage                          | Ambetter from Peach State Health Plan HIX                 |
| Blue Cross Blue Shield of Texas CHIP              | Texas          | Amida Care Advantage                                     | Ambetter from Sunshine Health HIX                         |
| Blue Cross Community FHP/ACA                      |                | Anthem Blue Cross Cal MediConnect Plan MMP               | Ambetter from Superior Health Plan HIX                    |
| Blue Cross Community ICP                          |                | Anthem Blue MedicareRx Plus                              | Ambetter IlliniCare HIX                                   |
| Blue Cross Community MMAI                         |                | Anthem Blue MedicareRx Premier                           | Ambetter NH HIX                                           |
| Blue Cross Complete                               |                | Anthem HealthKeepers MMP                                 | Ambetter of Arkansas HIX                                  |
| BlueChoice Health Plan of South Carolina Medicaid | South Carolina | Anthem MediBlue Access                                   | Ameriben Employees                                        |
| BlueCross BlueShield of Tennessee TennCare        | Tennessee      | Anthem MediBlue Access Enhanced                          | American Casino and Entertainment Properties              |
| BlueCross of Northeastern PA CHIP                 | Pennsylvania   | Anthem MediBlue Care To You                              | American Health Care                                      |
| BMC Mass Health                                   | Massachusetts  | Anthem MediBlue Coordination Plus                        | American Health Care Garden Grove Unified School District |
| Buckeye Community Health Plan                     |                | Anthem MediBlue Coordination Plus - CA                   | American Health Care Pinnacle                             |
| California Health and Wellness                    | California     | Anthem MediBlue Dual Advantage                           | Anthem BC GenRX                                           |
| CalOptima Medi-Cal                                |                | Anthem MediBlue ESRD                                     | Anthem BCBS HIX NV                                        |
| CalViva Health Medi-Cal                           |                | Anthem MediBlue Essential                                | Anthem Blue Cross Generic Premium                         |
| Care 1st Health Plan Medi-Cal                     |                | Anthem MediBlue Local/Diabetes/COPD                      | Anthem BlueCross BlueShield HIX CO                        |
| Care 1st HealthPlan Arizona                       |                | Anthem MediBlue Plus                                     | Anthem BlueCross BlueShield HIX CT                        |
| Care Wisconsin SSI Medicaid                       | Wisconsin      | Anthem MediBlue Plus - CA                                | Anthem BlueCross BlueShield HIX IN                        |
| CareOregon (OHP)                                  | Oregon         | Anthem MediBlue Select                                   | Anthem BlueCross BlueShield HIX KY                        |
| CarePlus National 5 w/ Medicaid Medications       |                | Anthem MediBlue Select - CA                              | Anthem BlueCross BlueShield HIX ME                        |
| CareSource Ohio Medicaid                          | Ohio           | Anthem MediBlue SmartFit                                 | Anthem BlueCross BlueShield HIX MO                        |
| Cascade Comprehensive Care HMO Medicaid           |                | Apollo, Apollo at Home, and Olympus Constellation Health | Anthem BlueCross BlueShield HIX NH                        |
| CDPHP Medicaid Select Plan and Family Health Plus |                | Archcare Advantage                                       | Anthem BlueCross BlueShield HIX OH                        |
| CeltiCare Health CarePlus                         |                | Arkansas Blue Cross Blue Shield Health Advantage Value   | Anthem BlueCross BlueShield HIX VA                        |
| CenCal Health                                     |                | Ascension Health                                         | Anthem BlueCross BlueShield HIX WI                        |

| <b>395 MEDICAID FORMULARIES</b>                            | <b>State</b>  | <b>656 MEDICARE ADVANTAGE FORMULARIES</b>                        | <b>870 COMMERCIAL FORMULARIES</b>                      |
|------------------------------------------------------------|---------------|------------------------------------------------------------------|--------------------------------------------------------|
| Cenpatco Integrated Care                                   |               | Aspire Health Plan Advantage and Advantage Plus                  | Anthem BlueCross HIX CA                                |
| Cenpatco Integrated Care Behavioral Health                 |               | Asuris Northwest Health Medicare                                 | Anthem COVA Care                                       |
| Central California Alliance For Health Medi-Cal            | California    | Asuris TruAdvantage + Rx Classic PPO + Rx Enhanced PPO           | Anthem Four Tier                                       |
| Childrens Community Health Plan BadgerCare Plus            |               | ATRIO Bronze Silver and Gold Rx                                  | Anthem National Closed                                 |
| Childrens Health Insurance Program Mississippi             | Mississippi   | ATRIO Special Needs Plan                                         | Anthem Three Tier                                      |
| Childrens Medical Services Network Florida MMA Specialty   | Florida       | Aurora Special Needs Plan                                        | Appvion Formulary                                      |
| CHP+ offered by Colorado Access                            | Colorado      | AvMed Medicare Choice                                            | Arise Health Plan                                      |
| CHP+ State Managed Care Network Formulary                  |               | Baptist Health Plan Advantage                                    | Arizona Department of Health Services (ADHS)           |
| CHRISTUS Health CHIP                                       |               | Basic Blue Rx PDP                                                | Arizona FCU                                            |
| CHRISTUS Health Plan STAR                                  |               | BC of Idaho True Blue & Special Needs Plan                       | Arizona Local Government Employee Benefit Trust        |
| Clear Health Alliance MMA Specialty                        |               | BC of Idaho TrueBlueRx Option I and II Performance               | Arizona Metropolitan Trust                             |
| Colorado Access RCCO                                       | Colorado      | BCBS Arizona Blue MedicareRx Value                               | Arkansas BlueCross BlueShield Formulary One (Standard) |
| Colorado Community Health Alliance RCCO                    | Colorado      | BCBS FL BlueMedicare Advantage Plan                              | Arkansas BlueCross BlueShield HIX                      |
| Colorado State Medicaid                                    | Colorado      | BCBS FL BlueMedicare Preferred                                   | Arkansas State and Public School Employees             |
| Community Care Central Colorado RCCO                       | Colorado      | BCBS Kansas City Blue Medicare Advantage Complete and Plus Plans | ASR Corporation Employees                              |
| Community First Health Plans Texas STAR                    | Texas         | BCBS Massachusetts Medicare Advantage                            | ATRIO Marketplace HIX OR                               |
| Community First Health Plans TX CHIP                       | Texas         | BCBS Michigan Medicare Plus Blue PPO                             | AultCare                                               |
| Community Health Choice CHIP                               |               | BCBS Michigan Prescription Blue PDP Options A & B                | AultCare MarketPlace HIX OH                            |
| Community Health Choice STAR                               |               | BCBS NC Blue Medicare Enhanced                                   | AultCare MarketPlace HIX OH Closed                     |
| Community Health Group Medi-Cal CompCare BadgerCare Plus   |               | BCBS NC Blue Medicare Essential                                  | Auto Wares Group                                       |
| CompCare SSI Medicaid                                      |               | BCBS NC Blue Medicare Rx Enhanced                                | Avera Health Plan HIX                                  |
| Comprehensive Medical and Dental Program (DES Foster Care) |               | BCBS NC Blue Medicare Rx Standard                                | Avera Health Plans                                     |
|                                                            |               | BCBS NC Blue Medicare Standard                                   | AvMed Engage and Empower Formulary                     |
| Connecticut Medicaid Husky A, C & D                        | Connecticut   | BCBS Nebraska Medicare Advantage Core and Choice                 | AvMed Health Plans                                     |
| Contra Costa Health Plan BHC                               |               | BCBS of Kansas Blue MedicareRx Plus                              | AvMed Miami Dade County HMO Medication Formulary       |
| Contra Costa Health Plan Medi-Cal                          |               | BCBS of Kansas Blue MedicareRx Premier                           | Baptist Health Plan KY HIX                             |
| Cook Childrens Health Plan CHIP                            |               | BCBS of Kansas Blue MedicareRx Value                             | Baptist Health Plan Master Preferred Four Tier         |
| Cook Children's Health Plan STAR                           |               | BCBS of Louisiana Blue Advantage                                 | Baptist Health Plan Master Preferred Three Tier        |
| Coordinated Care                                           |               | BCBS of Tennessee BlueAdvantage                                  | BayCare Health System                                  |
| County Medical Services Program (CMSP)                     |               | BCBSGa Blue MedicareRx Plus                                      | BC Northeastern PA                                     |
| CountyCare Health Plan                                     |               | BCBSGa Blue MedicareRx Premier                                   | BC OF IDAHO 2 TIER                                     |
| CountyCare Health Plan ICP                                 |               | BCBSGa Blue MedicareRx Standard                                  | BC OF IDAHO 3 Tier                                     |
| Coventry Florida MMA                                       | Florida       | BCBSGa MediBlue Access                                           | BC of Idaho Qualified Health Plans                     |
| Coventry Healthcare of Florida Healthy Kids                | Florida       | BCBSHP Dual Advantage                                            | BCBS Alabama                                           |
| CoventryCares of West Virginia                             | West Virginia | BCBSHP MediBlue Plus                                             | BCBS FEP Basic                                         |
| Crystal Run Health Plans Medicaid                          |               | BCBSHP MediBlue Prime Select                                     | BCBS FEP Standard                                      |
| Dean Health Plan BadgerCare Plus                           |               | BCN Advantage of Michigan                                        | BCBS IL, MT, NM, OK, TX Generics Plus 4 Tier           |

| <b>395 MEDICAID FORMULARIES</b>                                     | <b>State</b>   | <b>656 MEDICARE ADVANTAGE FORMULARIES</b>                    | <b>870 COMMERCIAL FORMULARIES</b>                       |
|---------------------------------------------------------------------|----------------|--------------------------------------------------------------|---------------------------------------------------------|
| Delaware Medical Assistance Program(DMAP)                           | Delaware       | Blue Advantage Complete and Premier                          | BCBS Illinois HMO                                       |
| Denver Health Medicaid Choice & CHP+                                | Colorado       | Blue Cross Blue Shield of Minnesota Platinum Blue            | BCBS Kansas City KS Blue & U HIX                        |
| Driscoll Childrens Health Plan CHIP                                 |                | Blue Cross Blue Shield of Minnesota SecureBlue               | BCBS Kansas City MO 2 Tier                              |
| Driscoll Children's Health Plan STAR                                |                | Blue Cross Medicare Advantage Basic IL/NM                    | BCBS Kansas City MO 3 Tier                              |
| El Paso First CHIP                                                  |                | Blue Cross Medicare Advantage Dual Care                      | BCBS Kansas City MO Blue & U HIX                        |
| El Paso First Premier                                               |                | Blue Cross Medicare Rx Gold                                  | BCBS Massachusetts 3 Tier HIX                           |
| Empire BlueCross BlueShield HealthPlus                              |                | Blue Cross MedicareRx Plus                                   | BCBS Massachusetts Three Tier                           |
| Empire Plan NY                                                      | New York       | Blue Cross MedicareRx Standard                               | BCBS Massachusetts Two Tier                             |
| Excellus Child Health Plus                                          |                | Blue Medicare Advantage                                      | BCBS MI 3 Tier Clinical Formulary                       |
| Excellus HMO Blue Option/Blue Choice Option                         |                | Blue MedicareRx Enhanced                                     | BCBS MI Preferred Rx 2T Closed                          |
| Fallon Community Health Plan MassHealth                             | Massachusetts  | Blue MedicareRx Plus PDP                                     | BCBS Michigan 5 Tier HIX                                |
| Fallon Health Weinberg                                              |                | Blue MedicareRx Premier                                      | BCBS Mississippi 4 TIER                                 |
| Family PACT (Planning, Access, Care and Treatment)                  |                | Blue MedicareRx Premier - CT, MA, RI, VT                     | BCBS Mississippi Preferred PPO                          |
| FamilyCare Medicaid                                                 |                | Blue MedicareRx Standard                                     | BCBS Montana 3 Tier                                     |
| Fidelis Care Child Health Plus                                      |                | Blue MedicareRx Value                                        | BCBS of Alabama 4 Tier                                  |
| First Choice by Select Health of South Carolina                     | South Carolina | Blue MedicareRx Value Plus - CT, MA, RI, VT                  | BCBS of Alabama Generics Plus 3 Tier                    |
| First Medical Health Plan                                           |                | Blue Rx Option II                                            | BCBS of Alabama Generics Plus 4 Tier                    |
| First Medical Health Plan Medicaid                                  |                | Blue Shield 65 Plus Riverside/San Diego                      | BCBS of Alabama Generics Plus Closed                    |
| FirstCare Health Plan CHIP                                          |                | Blue Shield 65 Plus Sacramento                               | BCBS of Alabama PrimeChoice Essential HIX               |
| FirstCare STAR                                                      |                | Blue Shield of CA 65 Plus                                    | BCBS of Alabama Standard HIX                            |
| Florida Medicaid                                                    | Florida        | Blue Shield of CA 65 Plus Choice                             | BCBS of Alabama Tiered Generic                          |
| Geisinger Health Plan CHIP                                          |                | Blue Shield of CA 65 Plus LA/Orange/San Bernardino Counties  | BCBS of Arizona HIX Portfolio & SimpleHealth            |
| Geisinger Health Plan Family                                        |                | Blue Shield of CA Group PDP Medicare Rx & Group MAPD 65 Plus | BCBS of Arizona with Specialty                          |
| Georgia Department of Community Health                              | Georgia        | Blue Shield of CA Medicare Basic (PDP)                       | BCBS of AZ HIX EverydayHealth, TrueHealth and Essential |
| Gold Coast Health Plan                                              |                | Blue Shield of CA Medicare Enhanced                          | BCBS of Georgia HIX GA                                  |
| Group Health Cooperative Eau Claire SSI Medicaid                    |                | BlueAdvantage Administrators of Arkansas                     | BCBS of Illinois                                        |
| Group Health Cooperative of Eau Claire BadgerCare Plus              |                | BlueCare Plus                                                | BCBS of Illinois Marketplace 5 Tier Generics Plus HIX   |
| Group Health Cooperative of South Central Wisconsin BadgerCare Plus | Wisconsin      | BlueCHIP for Medicare BCBS Rhode Island                      | BCBS of Kansas BlueCare HIX                             |
| Gundersen Lutheran Health Plan BadgerCare Plus                      |                | BlueCross Rx Plus                                            | BCBS of Kansas National/Select Three Tier               |
| Harbor Health Plan                                                  |                | BlueCross Rx Value                                           | BCBS of Kansas National/Select Two Tier Closed          |
| Harmony Medicaid Illinois                                           | Illinois       | BlueJourney Classic                                          | BCBS of Kansas National/Select Two Tier Open            |
| Health Alliance CONNECT FHP/ACA                                     |                | BlueJourney Prime/Premier/Value & Essential                  | BCBS of Louisiana 2 Tier                                |
| Health Net Medi-Cal                                                 |                | BlueMedicare Advantage                                       | BCBS of Louisiana 4 Tier                                |
| Health New England Be Healthy                                       |                | BlueRx Option I                                              | BCBS of MI 2 Tier Clinical                              |
| Health Partners of Philadelphia                                     | Pennsylvania   | BMC HealthNet Plan Senior Care Options                       | BCBS of Michigan Preferred Rx 2 Tier Open               |
| Health Plan of Nevada Medicaid                                      | Nevada         | Brand New Day                                                | BCBS of Michigan Preferred Rx Three Tier                |
| Health Plan of San Joaquin                                          |                | Bridgeway Arizona Long Term Care Plan (ALTCs)                | BCBS of Minnesota FlexRx 2 Tier                         |
| Health Plan of San Mateo                                            |                | Bridgeway Health Solutions Advantage                         | BCBS of Minnesota FlexRx Closed                         |
| Health Tradition BadgerCare Plus                                    |                | Buckeye Community Health Plan - MyCare Ohio MMP              | BCBS of Minnesota FlexRx Three Tier                     |
| Healthfirst Child Health Plus                                       |                | Buckeye Health Plan Advantage                                | BCBS of Minnesota GenRx 4 Tier                          |
| Healthfirst NY Medicaid Managed Care                                | New York       | CalOptima OneCareConnect MMP                                 | BCBS of Minnesota GenRx MN HIX                          |

| <b>395 MEDICAID FORMULARIES</b>                    | <b>State</b>  | <b>656 MEDICARE ADVANTAGE FORMULARIES</b>                        | <b>870 COMMERCIAL FORMULARIES</b>                      |
|----------------------------------------------------|---------------|------------------------------------------------------------------|--------------------------------------------------------|
| HealthSpring STAR+PLUS                             |               | Capital District Physicians Health Plan                          | BCBS of Montana EfficientRx/Generics Plus              |
| Healthy U                                          |               | Capital District Physicians Health Plan Medicare Choices         | BCBS of Montana Marketplace Generics Plus HIX          |
| Hennepin Health Plan                               |               | Care 1st Medicare Health Plan                                    | BCBS of Nebraska Individual 5 Tier HIX                 |
| HIP Child Health Plus                              |               | Care Improvement Dual Advantage/Silver Rx                        | BCBS of New Mexico                                     |
| HIP Medicaid/FHPlus                                |               | Care Improvement Plus Gold Rx/Medicare Advantage                 | BCBS of New Mexico 4 Tier                              |
| HMSA Children's Plan                               |               | Care N Care Medicare Health Plan                                 | BCBS of North Carolina Basic 5T Closed                 |
| HMSA Quest                                         |               | Care Wisconsin                                                   | BCBS of North Carolina Basic 5T Open                   |
| Humana CareSource Kentucky Medicaid                | Kentucky      | Care Wisconsin Medicare Dual Advantage HMO SNP                   | BCBS of North Carolina Basic 5T Open HIX               |
| Humana Florida MMA                                 | Florida       | Care1st Cal MediConnect Plan MMP                                 | BCBS of North Carolina Enhanced 4 Tier                 |
| Humana National 5 w/ Kidney Care                   |               | CareMore                                                         | BCBS of North Carolina Enhanced 5 Tier                 |
| Humana National 5 w/ Kidney Care & Home Infusion   |               | CareMore Cal MediConnect MMP Plan                                | BCBS of North Dakota                                   |
| Humana National 5 w/ Medicaid & ED Drugs           |               | CareOregon Advantage Plus                                        | BCBS of North Dakota HIX                               |
| Humana National 5 w/ Medicaid Medications          |               | CareOregon Advantage Star                                        | BCBS of Oklahoma 4 Tier                                |
| iCare BadgerCare Plus                              |               | CarePlus Medicare Plus 5 with GC                                 | BCBS of Oklahoma Marketplace 5 Tier Generics Plus      |
| iCare SSI Medicaid                                 |               | CarePlus Medicare Plus-5                                         | BCBS of South Carolina Blue Option HIX                 |
| Idaho Medicaid                                     | Idaho         | CarePlus Medicare Plus-5 w/ ED Drugs                             | BCBS of South Carolina BlueEssentials HIX              |
| IlliniCare Health Plan                             |               | CarePlus Medicare Plus-5 w/ Medicaid & ED Drugs                  | BCBS of South Carolina Preferred                       |
| IlliniCare Health Plan FHP/ACA                     |               | CarePlus National 5 Formulary                                    | BCBS of South Carolina Preferred 3 Tier with Specialty |
| Illinois Medicaid                                  | Illinois      | CarePlus National 5 w/ Home Infusion                             | BCBS of South Carolina Try Generics                    |
| IMCare                                             |               | CarePlus-5 w/ Home Infusion                                      | BCBS of Texas 3 Tier                                   |
| Independent Health MediSource and CHIP             |               | CarePlus-5 w/ Maintenance Medications                            | BCBS of Texas 4 Tier                                   |
| Indiana Medicaid                                   | Indiana       | CareSource IN Medicare                                           | BCBS of Texas HIX 5 Tier Generics Plus                 |
| Inland Empire Health Plan Healthy Kids             |               | CareSource KY Medicare                                           | BCBS of Vermont                                        |
| Inland Empire Health Plan Medi-Cal                 |               | CareSource MyCare Ohio MMP                                       | BCBS of Western NY Formulary 1                         |
| Integrated Community Health Partners RCCO          |               | CareSource OH Medicare                                           | BCBS of Western NY Formulary 2                         |
| InterCommunity Health Network CCO                  |               | CCHP Senior Program                                              | BCBS of Western NY Formulary 3/Exclusive Small Group   |
| Iowa State Medicaid                                | Iowa          | CCHP Senior Select Program (HMO SNP)                             | BCBS of Wyoming                                        |
| Kaiser Permanente Mid-Atlantic Medicaid and FAMIS  |               | Centerlight Healthcare Direct                                    | BCBS of Wyoming BlueSelect 3 Tier HIX                  |
| Kentucky Health Choices Medicaid                   | Kentucky      | CenterLight Healthcare FIDA Plan                                 | BCBS of Wyoming BlueSelect 4 Tier HIX                  |
| Kern Family Health Care Medi-Cal KidzPartners      |               | Centers Plan FIDA Care Complete                                  | BCBS Tennessee HIX                                     |
| LA Care Health Plan Healthy Kids                   | Louisiana     | Centers Plan for Healthy Living Medicare                         | BCBS Tennessee Standard Formulary                      |
| LA Care Health Plan Medi-Cal                       | Louisiana     | Centers Plan for Healthy Living Medicare SNP                     | BCN MI Blue Essentials                                 |
| Louisiana Medicaid                                 | Louisiana     | Central Health Medicare Plan                                     | BCN MI Custom 5T Formulary                             |
| Magellan Complete Care MMA Specialty               |               | CHRISTUS Health Plan Generations                                 | BCN MI Custom Formulary Three Tier Closed              |
| MaineCare                                          |               | Cigna Advantage Four Tier                                        | BCN Michigan Custom Formulary 2 Tier                   |
| Managed Health Services BadgerCare Plus            |               | Cigna Advantage Three Tier with DRT                              | BCN Michigan Custom Formulary 2 Tier Open              |
| Managed Health Services Indiana Hoosier Healthwise |               | Cigna Advantage Three Tier without DRT                           | BCN Michigan HIX MI                                    |
| Managed Health Services SSI Medicaid               |               | Cigna-HealthSpring Achieve                                       | BeneCard PBF                                           |
| Maricopa Managed Care Arizona                      |               | Cigna-HealthSpring Achieve Plus/Preferred/Preferred Plus AZ Only | Black Hawk County 1 Formulary                          |
| Maryland State Medicaid                            | Maryland      | Cigna-HealthSpring CarePlan MMP                                  | Black Hawk County 2 Formulary                          |
| Masshealth Medicaid                                | Massachusetts | Cigna-HealthSpring CarePlan of Illinois MMP                      | Black Hawk County 3 Formulary                          |
|                                                    |               | Cigna-HealthSpring Medicare Rx Secure                            | Blain                                                  |



| <b>395 MEDICAID FORMULARIES</b>                            | <b>State</b> | <b>656 MEDICARE ADVANTAGE FORMULARIES</b>                            | <b>870 COMMERCIAL FORMULARIES</b>                         |
|------------------------------------------------------------|--------------|----------------------------------------------------------------------|-----------------------------------------------------------|
| McLaren Health Plan Medicaid                               |              | Cigna-HealthSpring Medicare Rx Secure-Extra                          | Blue Care Network of Michigan FEHBP                       |
| MDwise HIP Basic Plan                                      |              | Cigna-HealthSpring Preferred/Preferred Plus/Premier/PreventativeCare | Blue Cross Blue Shield LA 3 Tier                          |
| MDwise HIP Plus Plan                                       |              | Cigna-HealthSpring Primary/TotalCare/Traditions                      | Blue Cross Blue Shield Nebraska Standard 4 Tier           |
| MDwise HIP State Plan                                      |              | Cigna-HealthSpring SpecialCare of Illinois ICP                       | Blue Cross Blue Shield of Nebraska                        |
| MDwise HIP State Plus Plan                                 |              | ClearRiver Health Medicare                                           | Blue Cross Blue Shield of Rhode Island 5 Tier             |
| MDwise Hoosier Care Connect                                | Indiana      | Clover Health Classic/CarePoint/Premier                              | Blue Cross Blue Shield of Rhode Island HIX                |
| MDwise Hoosier Healthwise                                  | Indiana      | Clover Health Prestige                                               | Blue Cross Blue Shield of Rhode Island Large Group 4 Tier |
| Medi Cal                                                   |              | Commonwealth Care Alliance MMP                                       | Blue Cross Blue Shield of Rhode Island Large Group 5 Tier |
| Medica Medicaid                                            |              | Commonwealth Care Alliance Senior Care Options                       | Blue Cross Blue Shield of Western NY HIX                  |
| Medical Assistance (Pennsylvania Medicaid)                 | Pennsylvania | CommuniCare Advantage Cal MediConnect MMP                            | Blue Selections Louisiana 5 Tier                          |
| Medical Assistance District of Columbia                    | DC           | Community Care Alliance of IL Advantage                              | Blue Shield HIX California                                |
| MedStar Family Choice - DC Healthy Families                | DC           | Community Care Alliance of IL Complete                               | Blue Shield of California Plus Formulary                  |
| MedStar Family Choice Health Plan                          |              | Community Care Alliance of IL Flex-Plan                              | Blue Shield of Northeastern NY HIX                        |
| Mercy Care Plan                                            |              | Community Care Alliance of Illinois                                  | BlueChoice HealthPlan of South Carolina Tiered            |
| Mercy Maricopa Integrated Care                             |              | Community Care OK                                                    | BlueChoice/BlueChoice Plus                                |
| Mercy Maricopa Integrated Care Behavioral Health Drug List |              | Community Care Partnership Program                                   | BlueCross BlueShield of Georgia 3 Tier                    |
| MercyCare Health Plan WI BadgerCare Plus                   |              | Community HealthFirst MA Special Needs Plan                          | BlueCross BlueShield of Georgia 4 Tier                    |
| MercyCare Health Plans 2-Tier                              |              | Community HealthFirst Medicare Advantage Plans                       | BlueCross BlueShield of Oklahoma/BlueLincs                |
| MercyCare Health Plans 3-Tier                              |              | CommunityCare Advantage                                              | BlueShield of Northeastern New York Formulary 1           |
| Meridian Health Plan of Illinois                           | Illinois     | CommunityCare Senior Health Plan                                     | BlueShield of Northeastern NY Formulary 2                 |
| Meridian Health Plan of Illinois ICP                       | Illinois     | ConnectiCare Medicare Advantage                                      | BlueShield of Northeastern NY Formulary 3                 |
| Meridian Health Plan of Michigan                           | Michigan     | Coventry Health Care 5 Tier                                          | BMC HealthNet ConnectorCare/Qualified Health Plan         |
| MeridianCare                                               |              | Coventry Health Care B1 Formulary                                    | Board of Pensions of the Presbyterian Church              |
| MetroPlus Child Health Plus                                |              | Coventry Health Care B2 Formulary                                    | Board of Regents of The University System of Georgia      |
| MetroPlus Health Plan New York Medicaid                    | New York     | Coventry Health Care B3 Formulary                                    | Bomarko Formulary                                         |
| MHS Healthy Indiana HIP Basic                              | Indiana      | Coventry Health Care B4 Formulary                                    | Bridgespan Essential HIX ID                               |
| MHS Healthy Indiana HIP Plus                               | Indiana      | CoxHealth MedicarePlus                                               | Bridgespan Essential HIX OR                               |
| MHS Healthy Indiana HIP State                              | Indiana      | Dean Advantage Assurance, Balance, Confidence                        | Bridgespan Essential HIX WA                               |
| MHS Healthy Indiana HIP State Plus                         | Indiana      | Denver Health Medicare Choice                                        | Bridgespan Standard Formulary HIX OR                      |
| Michigan Medicaid                                          | Michigan     | Denver Health Medicare Select                                        | CalPERS                                                   |
| Minnesota Medicaid                                         | Minnesota    | Easy Choice Best                                                     | Capital Blue Cross 4 Tier                                 |
| Mississippi Medicaid                                       | Mississippi  | Easy Choice Best Los Angeles/Orange County                           | Capital BlueCross                                         |
| Missouri Care Health Plan                                  | Missouri     | Easy Choice Freedom                                                  | Capital BlueCross Closed                                  |
| MMM Multi Health Medicaid                                  |              | Easy Choice Plus                                                     | Capital BlueCross HIX PA                                  |
| MO Healthnet (formerly Missouri Medicaid)                  | Missouri     | Elderplan FIDA Total Care                                            | Capital Health Plan                                       |
| Moda Health - Oregon Health Plan                           | Oregon       | Elderplan Healthy Balance                                            | Capital Health Plan FEHBP                                 |
| Molina Healthcare of Florida MMA                           | Florida      | Elderplan Medicare                                                   | Capital Health Plan Medicare Advantage                    |
| Molina Healthcare of Illinois                              | Illinois     | EmblemHealth Medicare HMO                                            | CareFirst Formulary 2 3 Tier                              |
| Molina Healthcare of Illinois FHP/ACA                      | Illinois     | EmblemHealth National Drug Plan (PDP) Standard/Enhanced Formulary    | CareFirst Formulary 2 4 Tier                              |

| <b>395 MEDICAID FORMULARIES</b>                  | <b>State</b>   | <b>656 MEDICARE ADVANTAGE FORMULARIES</b>                               | <b>870 COMMERCIAL FORMULARIES</b>                |
|--------------------------------------------------|----------------|-------------------------------------------------------------------------|--------------------------------------------------|
| Molina Healthcare of Michigan                    | Michigan       | EmblemHealth Premier Formulary                                          | CareFirst Formulary 2 HIX                        |
| Molina Healthcare of New Mexico                  | New Mexico     | EmblemHealth Select Formulary                                           | CareSource Just4Me HIX IN                        |
| Molina Healthcare of Ohio                        | Ohio           | EMI Health Educators Rx Advantage                                       | CareSource Just4Me HIX KY                        |
| Molina Healthcare of Puerto Rico Medicaid        | Puerto Rico    | Empire Dual Advantage                                                   | CareSource Just4Me HIX OH                        |
| Molina Healthcare of South Carolina              | South Carolina | Empire MediBlue Access                                                  | CareSource Just4Me HIX WV                        |
| Molina Healthcare of Texas CHIP                  | Texas          | Empire MediBlue Choice                                                  | Cascade Die Casting                              |
| Molina Healthcare of Utah CHIP                   | Utah           | Empire MediBlue Plus                                                    | Caterpillar Drug Formulary                       |
| Molina HealthCare of Utah Medicaid               | Utah           | EnvisionRx Plus Clear Choice                                            | CDPHP Formulary 2 HIX NY                         |
| Molina Healthcare of WA                          | Washington     | EnvisionRxPlus PDP                                                      | Central PA Teamsters                             |
| Molina Healthcare of Wisconsin BadgerCare Plus   | Wisconsin      | Eon Medicare Advantage                                                  | CHG Staffing                                     |
| Molina Healthcare of Wisconsin SSI Medicaid      | Wisconsin      | Eon Medicare Advantage CSNP                                             | Chinese Community Health Plan Commercial         |
| Molina Healthcare Texas STAR                     | Texas          | Erickson Advantage                                                      | Chinese Community Health Plan HIX                |
| Molina Healthcare Texas STAR+PLUS                | Texas          | Essence                                                                 | CHRISTUS Health Plan New Mexico HIX              |
| Molina Medi-Cal                                  |                | Excellus Medicare                                                       | CHRISTUS Health Plan Texas HIX                   |
| Montana Medicaid                                 | Montana        | Excellus Medicare BluePlus                                              | Cigna Generics Only                              |
| Montana Mental Health Services Plan              | Montana        | Express Scripts Basic with Advantage                                    | Cigna Legacy Three Tier                          |
| MVP Option Child                                 |                | Express Scripts Basic with Advantage Plus                               | Cigna Performance Four Tier                      |
| Nebraska State Medicaid                          | Nebraska       | Express Scripts High Performance with Advantage                         | Cigna Performance Three Tier                     |
| Neighborhood Health Plan Five Tier               |                | Express Scripts High Performance with Advantage Plus                    | Cigna Rx Essential 5-Tier HIX                    |
| Neighborhood Health Plan MassHealth              | Massachusetts  | Express Scripts Medicare Choice                                         | Cigna Rx Plus HIX TX, GA, and TN                 |
| Neighborhood Health Plan of RI Rite Care         | Rhode Island   | Express Scripts Medicare Value Plan                                     | Cigna Rx Premier HIX                             |
| Neighborhood Health Plan Three Tier              |                | Express Scripts National Preferred with Advantage                       | Cigna Standard Three Tier                        |
| Network Health Plan of Wisconsin BadgerCare Plus | Wisconsin      | Express Scripts National Preferred with Advantage Plus                  | Cigna Value Three Tier with DRT                  |
| Network Health Plan of Wisconsin SSI Medicaid    | Wisconsin      | Fallon Senior Plan                                                      | Cigna Value Three Tier without DRT               |
| Nevada State Medicaid                            | Nevada         | Fallon Senior Plan Group 1                                              | City of Austin Traditional 3 Tier                |
| New Hampshire Healthy Families                   | New Hampshire  | FamilyCare Medicare                                                     | City of Janesville 2 Tier                        |
| New Hampshire State Medicaid                     | New Hampshire  | Farm Bureau Essential Rx                                                | City of Janesville 3 Tier                        |
| New Jersey State Medicaid                        | New Jersey     | Farm Bureau Select Rx                                                   | City of La Crosse                                |
| New Mexico Medicaid                              | New Mexico     | FHCP BlueMedicare Preferred                                             | City of North Platte                             |
| New York State Medicaid                          | New York       | FHCP Medvantage/Premier                                                 | Clear Script Formulary                           |
| NextLevel Health Medicaid                        |                | Fidelis Care FIDA Plan                                                  | Cleveland Clinic EHP Drug Formulary              |
| North Carolina Health Choice                     | North Carolina | Fidelis Care New York                                                   | Commercial Roofing Benefits                      |
| North Carolina Medicaid                          | North Carolina | Fidelis Dual Advantage, Dual Advantage Flex and Medicaid Advantage Plus | Common Ground Healthcare Cooperative HIX WI      |
| North Dakota State Medicaid                      | North Dakota   | Fidelis Medicare Advantage Flex and Medicare Zero Dollar Premium        | Community Bank and Trust                         |
| Ohana QUEST Integration                          |                | Fidelis SecureLife MMP                                                  | Community First Health Plans                     |
| Ohio Medicaid                                    | Ohio           | First Choice VIP Care Plus MMP                                          | Community First Health Plans HIX TX              |
| Oklahoma Medicaid (SoonerCare)                   | Oklahoma       | First Health Part D A2 Formulary                                        | Community Health Choice HIX TX                   |
| ONECare by Care1st Health Plan Arizona           | Arizona        | First Health Part D A3 Formulary                                        | Community Health Plan of Washington Apple Health |
| Optima Family Care/FAMIS                         |                | First+Plus Advantage                                                    | Community Health Plan of Washington HIX          |
| Oregon Health Plan (Medicaid)                    | Oregon         | First+Plus Advantage Plus                                               | ConnectiCare 3 Tier                              |
| PacificSource Community Solutions                |                | FirstCare Advantage                                                     | ConnectiCare Freedom HIX CT                      |
| PacificSource Health Plans PDL/VDL               |                | FirstCare Advantage Select (HMO SNP)                                    | CoventryOne FL HIX                               |
| Parkland HEALTHfirst                             |                | FirstMedicare Direct                                                    | CoventryOne HIX                                  |
| Parkland KIDSfirst                               |                | FirstMedicare Direct preferredPLUS                                      | Cox Health Plan                                  |

| <b>395 MEDICAID FORMULARIES</b>                       | <b>State</b>   | <b>656 MEDICARE ADVANTAGE FORMULARIES</b>                     | <b>870 COMMERCIAL FORMULARIES</b>                                   |
|-------------------------------------------------------|----------------|---------------------------------------------------------------|---------------------------------------------------------------------|
| Partnership HealthPlan of CA Healthy Kids             | California     | Freedom Health Medicare                                       | Cox Smith Matthews Incorporated                                     |
| Partnership HealthPlan of CA Medi-Cal                 | California     | Freedom Health Medi-Medi Full                                 | Crystal Run Health Commercial                                       |
| Passport Health Plan                                  |                | Freedom Health Medi-Medi Partial                              | Culinary Health Fund Formulary                                      |
| Peach State Health Plan Medicaid                      |                | Freedom Medicare VIP Care VIP Savings                         | Cummins Custom                                                      |
| PEEHIP Viva Health                                    |                | Fresenius Health Medicare                                     | CVS Caremark Advanced Control Formulary                             |
| Pennsylvania Open Formulary                           | Pennsylvania   | Gateway Health Plan Medicare Assured - Gold and Platinum      | CVS Caremark Performance Formulary                                  |
| PHC Florida MMA Specialty                             | Florida        | Gateway Health Plan Medicare Assured - Prime and Select       | CVS Caremark Performance w/ Advanced Specialty Control              |
| Phoenix Health Plan                                   | Arizona        | Gateway Health Plan Medicare Assured - Ruby and Diamond       | CVS Caremark Performance w/ Exclusions                              |
| Physicians Plus Insurance Corporation BadgerCare Plus |                | Gateway Health Plan Pennsylvania                              | CVS Caremark Performance w/ Exclusions & Advanced Specialty Control |
| PMC Medicaid                                          |                | Geisinger Gold \$0 Deductible Rx                              | CVS Caremark Value                                                  |
| Prestige Health Choice MMA                            |                | Geisinger Gold Standard Rx                                    | Cypress Care Workers' Compensation Drug List                        |
| PrimaryHealth of Josephine County                     |                | Generations Healthcare Classic                                | DakotaCare                                                          |
| PrimeWest Health Medicaid                             |                | GlobalHealth Generations Premier & Select                     | Dalton Corporation                                                  |
| Priority Health Michigan Medicaid                     | Michigan       | GlobalHealth Medicare                                         | Dean Health Plan HIX WI                                             |
| Priority Partners                                     |                | Golden State Medicare                                         | Dean Health Plan Three Tier                                         |
| Providence Health Plan-Oregon Health Plan             | Oregon         | Group Health Cooperative Medicare Advantage                   | Dean Health Plan Two Tier                                           |
| Rhode Island Medicaid                                 | Rhode Island   | Group UCare for Seniors                                       | Denver Health Elevate HIX CO                                        |
| RightCare from Scott & White                          |                | GuildNet Gold                                                 | Doctors Hospital at Renaissance                                     |
| Rocky Mountain Child Health Plan Plus                 |                | GuildNet Gold Plus FIDA Plan                                  | DTR Industries                                                      |
| Rocky Mountain Medicaid                               |                | Gundersen Lutheran Senior Preferred                           | East Liverpool City Hospital                                        |
| Rocky Mountain RCCO                                   |                | HAP Midwest Medicare Advantage                                | ELCA Board of Pensions                                              |
| San Francisco Health Plan Healthy Kids                | California     | HAP Midwest MI Health Link MMP                                | Eli Lilly Drug List                                                 |
| San Francisco Health Plan Medi-Cal                    | California     | HAP Senior Plus Medicare                                      | EmblemHealth Select Care HIX                                        |
| Sanford Health Plan North Dakota Medicaid             | North Dakota   | Harbor Advantage                                              | EMI Health Educators Rx Basic                                       |
| Santa Clara Family Health Plan Healthy Kids           |                | HarvestPlains Health Medicare                                 | Empire BCBS Select HIX NY                                           |
| Santa Clara Family Health Plan Medi-Cal               |                | Health Alliance CONNECT                                       | Empire BlueCross HIX NY                                             |
| Security Health Plan of Wisconsin BadgerCare Plus     | Wisconsin      | Health Alliance Medicare                                      | Envolve                                                             |
| SelectHealth Community Care                           |                | Health Alliance-IL Open Three Tier                            | Evergreen Health Cooperative HIX MD                                 |
| Sendero Health Plan CHIP                              |                | Health Choice Arizona                                         | Excellus BCBS 3 Tier                                                |
| Sendero Health Plan STAR                              |                | Health Choice Generations                                     | ExcellusBCBS HIX NY                                                 |
| Seton Health Plan CHIP                                |                | Health Choice Integrated Care                                 | Excelsior NY State Employees Plan                                   |
| Seton Health Plan STAR                                |                | Health Choice Utah                                            | Exclusive Care                                                      |
| Simply Healthcare MMA                                 |                | Health First Medicare Classic, Rewards and Value              | Express Scripts Basic Formulary                                     |
| South Carolina Medicaid                               | South Carolina | Health First Medicare Florida Hospital Explorer and SunSaver  | Express Scripts Basic with Limited                                  |
| South Country Health Alliance                         |                | Health Net Access                                             | Express Scripts EGWP High Performance 3 Tier                        |
| South Dakota Medicaid                                 | South Dakota   | Health Net Cal MediConnect MMP                                | Express Scripts EGWP National Preferred 3 Tier                      |
| South Florida Community Care Network MMA              | Florida        | Health New England Medicare                                   | Express Scripts EGWP National Preferred 4 Tier                      |
| Staywell Health Plan Florida MMA                      | Florida        | Health Options Program Basic and Enhanced Medicare Rx Options | Express Scripts High Performance                                    |
| Sunflower State Health Plan KANCARE                   |                | Health Partners Medicare Prime and Value                      | Express Scripts High Performance with Limited                       |
| Sunshine Health MMA                                   |                | Health Partners Medicare Special                              | Express Scripts National Preferred                                  |

| <b>395 MEDICAID FORMULARIES</b>                             | <b>State</b>  | <b>656 MEDICARE ADVANTAGE FORMULARIES</b>                       | <b>870 COMMERCIAL FORMULARIES</b>                                       |
|-------------------------------------------------------------|---------------|-----------------------------------------------------------------|-------------------------------------------------------------------------|
| Sunshine State Health Plan MMA Specialty                    |               | Health Plan of San Mateo CareAdvantage                          | Express Scripts National Preferred with Limited                         |
| Superior HealthPlan CHIP                                    |               | Health Plan of San Mateo CareAdvantage Cal MediConnect Plan MMP | Fallon Community Health Plan                                            |
| Superior HealthPlan STAR                                    |               | HealthChoice OK                                                 | Fallon Community Health Plan HIX MA                                     |
| Superior HealthPlan STAR+PLUS                               |               | Healthfirst AbsoluteCare FIDA Plan                              | Fidelis Care Exchange NY                                                |
| Texas Childrens Health Plan CHIP                            | Texas         | Healthfirst Medicare 65 Plus Plan                               | FirstCare Health Plans Commercial 5 Tier Formulary                      |
| Texas Childrens Health Plan STAR                            | Texas         | Healthfirst Medicare New York & New Jersey                      | FirstCare Health Plans Marketplace Formulary (HIX TX)                   |
| Texas CHIP Caremark                                         | Texas         | HealthNow New York Medicare                                     | Florida Blue Care Choices HIX                                           |
| Texas CHIP Navitus Formulary                                | Texas         | HealthPartners Minnesota Senior Health Options                  | Florida Blue Three Tier                                                 |
| Texas Medicaid                                              | Texas         | HealthPartners of Minnesota Medicare                            | Florida Blue Two Tier Closed                                            |
| The Health Plan West Virginia Medicaid                      | West Virginia | HealthPlus MedicarePlus                                         | Florida Blue ValueScript Rx HIX                                         |
| Total Health Care Healthy Michigan Formulary                | Michigan      | HealthSpan Medicare Advantage Plans                             | Florida Health Care Plan HIX                                            |
| Total Health Care Medicaid                                  |               | HealthSpan Medicare Core 2                                      | Geisinger Health Plan Traditional                                       |
| Total Health Care MICHild                                   |               | HealthSpan Medicare Plus (Cost)                                 | Geisinger Health Plan Triple Choice                                     |
| Trillium Medicaid (OHP)                                     |               | HealthSun HealthAdvantage                                       | Geisinger Marketplace Formulary                                         |
| Trilogy BadgeCare Plus                                      |               | HealthSun MediMax                                               | General Prescription Programs                                           |
| Trilogy Health SSI Medicaid                                 |               | HealthSun SunPlus Medicare Advantage                            | Genesis, Genesis Prime, Genesis at Home, and Orion Constellation Health |
| Triple-S Medicaid                                           |               | HealthTeam Advantage Plan                                       | Georgia State Health Benefit Plan                                       |
| Tuality Health Alliance Oregon Health Plan                  | Oregon        | HeartlandPlains Health Medicare                                 | GHI City of New York Employee Plans                                     |
| Tufts Health Together                                       |               | Hewlett-Packard Advantage 4-Tier                                | Gill Industries Formulary                                               |
| UCare Minnesota Medicaid                                    | Minnesota     | Highmark Medicare 5 Tier Closed                                 | GL Noble Denton Formulary                                               |
| Umpqua Health Alliance CCO                                  |               | HISC Blue Medicare Rx (PDP) Basic                               | GlobalHealth FEHBP                                                      |
| UniCare West Virginia Medicaid                              | West Virginia | HISC Blue Medicare Rx (PDP) Plus and Value                      | GlobalHealth State Employee & Educator Plan                             |
| UnitedHealthcare Community Plan - New York                  | New York      | Hometown Health Plan Senior Care Plus                           | Government Employee Health Association (GEHA)                           |
| UnitedHealthcare Community Plan - Wisconsin BadgerCare Plus | Wisconsin     | Horizon Medicare                                                | Group Health Cooperative HIX WA                                         |
| UnitedHealthcare Community Plan - Wisconsin SSI Medicaid    | Wisconsin     | Horizon Medicare Blue                                           | Group Health Cooperative of S Central WI Complete Three Tier            |
| UnitedHealthcare Community Plan Arizona Physicians IPA      | Arizona       | Horizon Medicare Blue Patient Centered Rx                       | Group Health Cooperative South Central Wisconsin HIX                    |
| UnitedHealthcare Community Plan Arizona Physicians IPA -CRS | Arizona       | Horizon NJ TotalCare                                            | Group Health Cooperative Washington                                     |
| UnitedHealthcare Community Plan Iowa Health Link            | Iowa          | Humana Gold Plus - Diabetes                                     | Gundersen Lutheran Health Plan                                          |
| UnitedHealthcare Community Plan MississippiCAN              | Mississippi   | Humana Gold Plus - Diabetes with ED Drugs                       | Harbor Health Plan HIX                                                  |
| UnitedHealthcare Community Plan MPlus MMA                   |               | Humana Gold Plus Integrated Illinois MMP                        | Harken Health GA HIX                                                    |
| UnitedHealthcare Community Plan of Arizona Evercare Select  | Arizona       | Humana Gold Plus Integrated Virginia MMP                        | Harken Health IL HIX                                                    |
| UnitedHealthcare Community Plan of Delaware                 | Delaware      | Humana Gold Plus Puerto Rico SNP-DE                             | Harris Corporation                                                      |
| UnitedHealthcare Community Plan of Florida                  | Florida       | Humana Integrated Care Program of Illinois                      | Harvard Pilgrim Premium 3 Tier                                          |
| UnitedHealthcare Community Plan of Kansas - KANCARE         | Kansas        | Humana Medicare Employer Plan                                   | Harvard Pilgrim Premium 4 Tier                                          |
| UnitedHealthcare Community Plan of Louisiana                | Louisiana     | Humana Medicare Plus - 5                                        | Harvard Pilgrim Stride and Stride of NH                                 |
| UnitedHealthcare Community Plan of Maryland                 | Maryland      | Humana Medicare Plus 5 with GC                                  | Harvard Pilgrim Value Formulary 3 Tier                                  |
| UnitedHealthcare Community Plan of Michigan - Michild       | Michigan      | Humana Medicare Plus 5 with Home Infusion and ED                | Harvard Pilgrim Value Formulary 4 Tier                                  |

| <b>395 MEDICAID FORMULARIES</b>                                       | <b>State</b>  | <b>656 MEDICARE ADVANTAGE FORMULARIES</b>                   | <b>870 COMMERCIAL FORMULARIES</b>                      |
|-----------------------------------------------------------------------|---------------|-------------------------------------------------------------|--------------------------------------------------------|
| UnitedHealthcare Community Plan of Michigan (formerly Great Lakes HP) | Michigan      | Humana Medicare Plus-5 Chronic Lung                         | Harvard Pilgrim Value Formulary 5 Tier                 |
| UnitedHealthcare Community Plan of Mississippi - MS CHIP              | Mississippi   | Humana Medicare Plus-5 Congestive Heart                     | Health Alliance Medical Plans HIX                      |
| UnitedHealthcare Community Plan of Nebraska                           | Nebraska      | Humana Medicare Plus-5 Palm Beach                           | Health Alliance Plan HIX MI                            |
| UnitedHealthcare Community Plan of New Jersey                         | New Jersey    | Humana Medicare Plus-5 w/ ED Drugs                          | Health Alliance Plan of Michigan 2-Tier                |
| UnitedHealthcare Community Plan of New Mexico CentennialCare          | New Mexico    | Humana Medicare Plus-5 w/ Home Infusion                     | Health Alliance Plan of Michigan 3-Tier                |
| UnitedHealthcare Community Plan of New York CHIP                      | New York      | Humana Medicare Plus-5 w/ Maintenance Medications           | Health Choice Arizona Essential HIX AZ                 |
| UnitedHealthcare Community Plan of Ohio                               | Ohio          | Humana Medicare Plus-5 w/ Medicaid & ED Drugs               | Health First Health Plans Florida 3Tier                |
| UnitedHealthcare Community Plan of Pennsylvania                       | Pennsylvania  | Humana Medicare Plus-5 w/ Medicaid Medications              | Health First Health Plans Florida 5 Tier               |
| UnitedHealthcare Community Plan of Pennsylvania CHIP                  | Pennsylvania  | iCare Family Care Partnership Plan                          | Health First Health Plans Florida HIX                  |
| UnitedHealthcare Community Plan of Rhode Island                       | Rhode Island  | iCare Medicare Plan                                         | Health Net of Arizona 3 Tier Simplified with Specialty |
| UnitedHealthcare Community Plan of Texas STAR                         | Texas         | ICS Community Care Plus FIDA                                | Health Net of Arizona 4 Tier Simplified with Specialty |
| UnitedHealthcare Community Plan of Texas STAR+PLUS                    | Texas         | IEHP DualChoice Cal MediConnect MMP                         | Health Net of Arizona 4 Tier Standard with Specialty   |
| UnitedHealthcare Community Plan of Washington Apple Health            | Washington    | IlliniCare Health Plan MMP                                  | Health Net of Arizona Essential Rx HIX                 |
| UnitedHealthcare Community Plan QUEST Integration Program             |               | Illinois Health Alliance Medicare DSNP MMP                  | Health Net of AZ 3 Tier Standard with Specialty        |
| UnitedHealthcare Community Plan TennCare                              | Tennessee     | IMCare Medicare                                             | Health Net of California Essential Rx HIX              |
| UnitedHealthcare Community Plan Texas CHIP                            | Texas         | Independent Health Medicare Advantage                       | Health Net of California Three Tier                    |
| Unity Health Plans Insurance Corporation BadgerCare Plus              |               | Indiana University Health Plans Medicare                    | Health Net of California Three Tier with Specialty     |
| UPMC For Kids                                                         |               | Inter Valley Health OC Preferred                            | Health Net of California Two Tier with Specialty       |
| Utah Medicaid                                                         | Utah          | Inter Valley Health Plan Desert Preferred Choice            | Health Net of Oregon Essential Rx                      |
| Vermont Medicaid                                                      | Vermont       | Inter Valley Health Plan Value Preferred Choice             | Health Net Washington Essential Rx                     |
| Virginia Medicaid                                                     | Virginia      | Inter Valley Health Service to Seniors                      | Health New England                                     |
| VNSNY CHOICE SelectHealth Formulary                                   |               | Johns Hopkins Advantage                                     | Health Plan of Nevada 4 Tier HIX                       |
| Washington State Medicaid                                             | Washington    | Kaiser Permanente Medicare Advantage Enhanced (Group Plans) | Health Plan of Nevada Three Tier                       |
| Washtenaw Health Plan B                                               |               | Kaiser Permanente Senior Advantage                          | Health Plans of Nevada Four Tier                       |
| Well Sense Health Plan                                                |               | KelseyCare Advantage                                        | Health Republic New Jersey HIX                         |
| WellCare /Staywell Healthy Kids                                       |               | Keystone 65 Focus Rx                                        | Health Select of Texas                                 |
| West Virginia Family Health Plan                                      | West Virginia | Keystone 65 Preferred HMO                                   | Health Tradition                                       |
| West Virginia Medicaid                                                | West Virginia | Keystone 65 Select HMO                                      | Health Tradition HIX                                   |
| Western Oregon Advanced Health CCO Medicaid                           | Oregon        | Keystone 65 Select Rx Preferred Rx Personal Choice 65 Rx    | HealthAmerica Pennsylvania B1 Formulary                |
| Willamette Valley Community Health                                    |               | Keystone VIP Choice                                         | HealthAmerica Pennsylvania B2 Formulary                |
| Wisconsin Medicaid                                                    | Wisconsin     | LA Care Cal MediConnect MMP                                 | HealthAmerica Pennsylvania B2 Formulary Closed         |
| Wyoming State Medicaid                                                | Wyoming       | Leon Cares Medicare Plan                                    | HealthAmerica Pennsylvania B3 Formulary                |
| YourCare Child Health Plus                                            |               | Liberty Health Advantage Dual Power                         | Healthfirst Leaf Plans HIX NY                          |
| YourCare Option                                                       |               | Liberty Health Advantage Preferred Choice                   | HealthLinc                                             |
|                                                                       |               | LifeWorks Advantage                                         | HealthNow New York Three Tier                          |
|                                                                       |               | Lovelace Senior Plan                                        | HealthPartners Minnesota                               |
|                                                                       |               | Magellan Rx Medicare Basic                                  | HealthPartners Minnesota FEHBP                         |

| <b>395 MEDICAID FORMULARIES</b> | <b>State</b> | <b>656 MEDICARE ADVANTAGE FORMULARIES</b>            | <b>870 COMMERCIAL FORMULARIES</b>               |
|---------------------------------|--------------|------------------------------------------------------|-------------------------------------------------|
|                                 |              | Magnolia Health Plan Medicare Advantage              | HealthPartners Minnesota Health Care Programs   |
|                                 |              | Maricopa Care Advantage                              | HealthPartners MN HIX GenericsAdvantage 2 Tier  |
|                                 |              | Martin's Point Generations Advantage                 | HealthPartners MN HIX GenericsAdvantage 4 Tier  |
|                                 |              | Martin's Point Generations Advantage Focus DC        | HealthPartners UnityPoint Health-Align-Symmetry |
|                                 |              | Martin's Point Generations Advantage Value Plus      | HealthPlus County Health Plan A and B           |
|                                 |              | McLaren Advantage Medicare                           | HealthPlus Enterprise & Large Group Commercial  |
|                                 |              | MCS Classicare I                                     | HealthPlus HMO/PPO Legacy Commercial            |
|                                 |              | MCS Classicare II                                    | HealthPlus VenturePlus & Signature Commercial   |
|                                 |              | Medica DUAL Solution                                 | HealthSmartRx                                   |
|                                 |              | Medica HealthCare Plans MedicareMax                  | HealthSpan HIX OH                               |
|                                 |              | Medica HealthCare Plans MedicareMax Plus             | HealthSpan Selected Formulary                   |
|                                 |              | Medica Prime Solution (Cost) Part D                  | HealthSpan Standard Formulary 3 Tier            |
|                                 |              | Medicare GenerationRx PDP                            | HealthSpan Standard Formulary 4 Tier            |
|                                 |              | MedicareBlue Rx Premier (BCBS IA MN MT NE ND SD WY)  | HealthSpan Traditional Formulary 2 Tier         |
|                                 |              | MedicareBlue Rx Standard (BCBS MN MT NE ND WY IA SD) | HealthSpan Traditional Formulary 3 Tier         |
|                                 |              | MediGold                                             | HealthyCT HIX                                   |
|                                 |              | MedImpact MedCare                                    | Hennepin County                                 |
|                                 |              | Medi-Pak Advantage Essential                         | Highmark BCBS Delaware                          |
|                                 |              | Medi-Pak Rx Basic/Advantage/Elite                    | Highmark BCBS Delaware HIX Comprehensive        |
|                                 |              | Medi-Pak Rx Premier                                  | Highmark BCBS HIX Comprehensive                 |
|                                 |              | MedMutual Advantage                                  | Highmark BCBS HIX Progressive                   |
|                                 |              | MedStar Medicare Choice                              | Highmark Blue Cross Blue Shield 3 Tier          |
|                                 |              | MedStar Medicare Choice Care Advantage               | Highmark Health Options                         |
|                                 |              | MedStar Medicare Choice Dual Advantage               | Highmark Progressive Formulary                  |
|                                 |              | Memorial Hermann Advantage                           | Hillsborough County Public Schools Rx4          |
|                                 |              | Mercy Care Advantage                                 | HIP Health Plan New York 2 Tier                 |
|                                 |              | Meridian Advantage Plan of Illinois                  | HMO Louisiana 3 Tier                            |
|                                 |              | Meridian Advantage Plan of Michigan                  | HMO Partners, Inc.                              |
|                                 |              | Meridian Complete IL MMP                             | HMSA Choice                                     |
|                                 |              | Meridian Complete MI MMP                             | HMSA Choice Non-Grandfathered Plans             |
|                                 |              | MetroPlus FIDA Plan                                  | HMSA Control                                    |
|                                 |              | MetroPlus Medicare                                   | HMSA Essential                                  |
|                                 |              | MHS Health Wisconsin Advantage                       | HMSA Metallic Prescription Formulary            |
|                                 |              | MHS Hoosier Care Connect                             | HMSA Select                                     |
|                                 |              | Midwest Health Plan                                  | HMSA Select Non-Grandfathered Plans             |
|                                 |              | Missouri Medicare Select                             | Home State Health Plan                          |
|                                 |              | MMM Diamante Choice Platino                          | Hometown Standard                               |
|                                 |              | MMM Diamante Excel Platino                           | Horizon BCBS of New Jersey                      |
|                                 |              | MMM Diamante Extra Platino                           | Horizon BCBS of New Jersey Two Tier             |
|                                 |              | MMM Elite Excel                                      | Horizon BlueCross BlueShield of NJ HIX          |
|                                 |              | MMM Elite Ultra                                      | Horizon NJ Health                               |
|                                 |              | MMM Supremo                                          | Hospitality Rx Formulary                        |
|                                 |              | MMM Unico                                            | Humana HDHP Complete HIX FL                     |
|                                 |              | MMM Unico Extra                                      | Humana HDHP Complete HIX TX                     |
|                                 |              | MN Advantage Health Plan                             | Humana HDHP EHB HIX                             |
|                                 |              | Molina Dual Options- Illinois MMP                    | Humana HDHP Plus HIX                            |
|                                 |              | Molina Dual Options MI Health Link MMP               | Humana HDHP Traditional                         |
|                                 |              | Molina Dual Options MyCareOhio MMP                   | Humana HDHP Value HIX CO and UT                 |
|                                 |              | Molina Dual Options SC MMP                           | Humana National 5 Closed                        |
|                                 |              | Molina Dual Options STAR+PLUS MMP                    | Humana National 5 Formulary                     |
|                                 |              | Molina Dual Options-California MMP                   | Humana National 5 PDP Enhanced                  |
|                                 |              | Molina Medicare                                      | Humana National 5 w/ ED Drugs                   |

| <b>395 MEDICAID FORMULARIES</b> | <b>State</b> | <b>656 MEDICARE ADVANTAGE FORMULARIES</b>                            | <b>870 COMMERCIAL FORMULARIES</b>                                    |
|---------------------------------|--------------|----------------------------------------------------------------------|----------------------------------------------------------------------|
|                                 |              | MVP Health Care Medicare                                             | Humana National 5 w/ Home Infusion                                   |
|                                 |              | NaviCare                                                             | Humana National 5 w/ Maintenance Medications                         |
|                                 |              | Navitus MedicareRx PDP                                               | Humana National 5 with GC                                            |
|                                 |              | Neighborhood INTEGRITY MMP                                           | Humana National 5 with Weight Loss                                   |
|                                 |              | Network Health Go, Anywhere & Network Platinum Plus, Premier, Select | Humana National 6 - Diabetes                                         |
|                                 |              | Network Health Plan                                                  | Humana National 6 CSNP                                               |
|                                 |              | NetworkCares Medicare                                                | Humana National 6 w/ ED & Maintenance Medications                    |
|                                 |              | New West Medicare                                                    | Humana National 6 w/ Maintenance Medications                         |
|                                 |              | NHC Advantage                                                        | Humana National 6 with Home Infusion                                 |
|                                 |              | North County Select Medicare                                         | Humana Preferred Rx                                                  |
|                                 |              | North Shore-LIJ FIDA LiveWell                                        | Humana Rx2 EHB                                                       |
|                                 |              | OneCare Medicare Advantage                                           | Humana Rx2 Traditional                                               |
|                                 |              | Optima Medicare Prime                                                | Humana Rx3 EHB                                                       |
|                                 |              | Optima Medicare Value                                                | Humana Rx3 Standard                                                  |
|                                 |              | Optimum Healthcare Diamonds Rewards Plan                             | Humana Rx3 Traditional                                               |
|                                 |              | Optimum HealthCare Emerald                                           | Humana Rx4 EHB                                                       |
|                                 |              | Optimum Healthcare Gold, Diamond Rewards and Platinum Plan           | Humana Rx4 EHB HIX                                                   |
|                                 |              | PacificSource Medicare                                               | Humana Rx4 Standard                                                  |
|                                 |              | Paramount Advantage Medicaid                                         | Humana Rx4 Traditional                                               |
|                                 |              | Paramount Elite Enhanced                                             | Humana Rx5 Complete HIX FL                                           |
|                                 |              | Paramount Elite Standard                                             | Humana Rx5 Complete HIX TX                                           |
|                                 |              | Passport Advantage                                                   | Humana Rx5 Plus HIX                                                  |
|                                 |              | Peach State Health Plan Advantage HMO SNP                            | Humana Rx5 Value HIX CO and UT                                       |
|                                 |              | Peach State Health Plan Medicare Advantage                           | Humana RxImpact                                                      |
|                                 |              | Peoples Health                                                       | Humana Walmart Rx Plan                                               |
|                                 |              | PERS Moda Health PPORX                                               | Iberia Medical Center                                                |
|                                 |              | Phoenix Advantage and Select                                         | IBM                                                                  |
|                                 |              | Phoenix Advantage Plus                                               | IdealCare from Sendero Health Plans                                  |
|                                 |              | PHP Care Complete FIDA IDD Plan                                      | Independence BC AmeriHealth Select                                   |
|                                 |              | Piedmont Select Medicare                                             | Independence Blue Cross HIX 4 Tier                                   |
|                                 |              | PMC Max Extra                                                        | Independence Blue Cross HIX 5 Tier                                   |
|                                 |              | PMC Premier Preferred Platino                                        | Independence Blue Cross/AmeriHealth NJ HIX 3 Tier                    |
|                                 |              | Positive Healthcare Partners                                         | Independent Health EGWP                                              |
|                                 |              | Preferred Choice Broward                                             | Independent Health FEHBP                                             |
|                                 |              | Preferred Choice Dade/Medicare Assist                                | Independent Health HIX NY                                            |
|                                 |              | Preferred Choice/Medicare Assist Palm Beach                          | Independent Health-Western New York                                  |
|                                 |              | Preferred Complete Care                                              | Indiana University Health Plan                                       |
|                                 |              | Preferred Secure Option                                              | InHealth Mutual HIX                                                  |
|                                 |              | Preferred Special Care Miami-Dade                                    | Integrated Prescription Management Basic Plus                        |
|                                 |              | Premera 3 Tier Incentive                                             | Intel Providence Health Plan                                         |
|                                 |              | Premera Blue Cross Medicare Advantage                                | International Foundation of Employee Benefit Plans                   |
|                                 |              | Premier Health Advantage                                             | INTotal Health                                                       |
|                                 |              | Premier Health Advantage VIP                                         | Irwin Telescopic Seating                                             |
|                                 |              | Presbyterian Senior Care                                             | IU Health Plans HIX                                                  |
|                                 |              | PrimeTime Health Plan - Plus & Classic                               | Jai Medical Systems                                                  |
|                                 |              | PrimeTime Health Plan Aultimate                                      | Johns Hopkins EHP Formulary                                          |
|                                 |              | PrimeWest Health Medicare                                            | Johnsonville Sausage                                                 |
|                                 |              | Priority Health Medicare                                             | Kaiser Permanente Colorado - Denver/Boulder/Northern HIX             |
|                                 |              | ProHealth Care Senior Preferred                                      | Kaiser Permanente Colorado - Southern HIX                            |
|                                 |              | Providence Medicare                                                  | Kaiser Permanente Colorado PPO                                       |
|                                 |              | Providence Medicare Dual Plus                                        | Kaiser Permanente Denver/Boulder, Mountain and Northern Colorado HMO |

| <b>395 MEDICAID FORMULARIES</b> | <b>State</b> | <b>656 MEDICARE ADVANTAGE FORMULARIES</b>                                   | <b>870 COMMERCIAL FORMULARIES</b>                 |
|---------------------------------|--------------|-----------------------------------------------------------------------------|---------------------------------------------------|
|                                 |              | Provider Partners Advantage                                                 | Kaiser Permanente EPO & Self Funded Colorado      |
|                                 |              | Provider Partners PA Advantage Plan                                         | Kaiser Permanente FEHBP Colorado                  |
|                                 |              | PruittHealth Premier                                                        | Kaiser Permanente Georgia HIX                     |
|                                 |              | QualChoice Advantage                                                        | Kaiser Permanente Georgia HMO                     |
|                                 |              | Quality Health Plans of NY - Medicare Advantage                             | Kaiser Permanente Georgia Multi-Choice            |
|                                 |              | Regence BCBS of Oregon BlueAdvantage HMO                                    | Kaiser Permanente Hawaii                          |
|                                 |              | Regence BCBS of Oregon MedAdvantage + RxClassic PPO + RxEnhanced PPO        | Kaiser Permanente Hawaii HIX 3 Tier               |
|                                 |              | Regence BCBS of Utah BlueAdvantage HMO                                      | Kaiser Permanente Hawaii HIX 4 Tier               |
|                                 |              | Regence BCBS of Utah MedAdvantage + Rx Classic PPO + Rx Enhanced PPO        | Kaiser Permanente Hawaii QUEST                    |
|                                 |              | Regence BlueShield of Idaho Blue MedAdvantage HMO + HMO Plus                | Kaiser Permanente Maryland HealthChoice           |
|                                 |              | Regence BlueShield of Idaho MedAdvantage + Rx Classic PPO + Rx Enhanced PPO | Kaiser Permanente Mid-Atlantic                    |
|                                 |              | Regence BlueShield of Washington BlueAdvantage HMO                          | Kaiser Permanente Mid-Atlantic HIX                |
|                                 |              | Regence BlueShield of Washington MedAdvantage + Rx Classic PPO              | Kaiser Permanente Northern California             |
|                                 |              | Regence Medicare Script Basic                                               | Kaiser Permanente Northern California HIX         |
|                                 |              | Regence Medicare Script Enhanced                                            | Kaiser Permanente Northwest                       |
|                                 |              | Reid Health Alliance Medicare                                               | Kaiser Permanente Oregon HIX                      |
|                                 |              | Retiree Rx Care                                                             | Kaiser Permanente S. Colorado HMO 2 Tier          |
|                                 |              | RiverLink Health Medicare                                                   | Kaiser Permanente Southern California             |
|                                 |              | RiverSpring FIDA Plan                                                       | Kaiser Permanente Southern California HIX         |
|                                 |              | RiverSpring Star                                                            | Kaiser Permanente Southern Colorado HMO Formulary |
|                                 |              | Rocky Mountain Health Plan Medicare Retirees                                | Kaiser Permanente Washington HIX                  |
|                                 |              | Rocky Mountain Premier Medicare                                             | Kalamazoo Anesthesiology                          |
|                                 |              | Samaritan Advantage Medicare                                                | Kansas State Group Health Insurance Program       |
|                                 |              | Samaritan Advantage Premier Plan Plus                                       | Kentucky Employees Health Plan 3 Tier             |
|                                 |              | Samaritan Advantage Special Needs Plan HMO                                  | Kentucky Rural Electric Cooperative               |
|                                 |              | Santa Clara Family Health Plan Cal MediConnect                              | KPS Health Plans                                  |
|                                 |              | SCAN Health Plan Medicare Advantage                                         | Kroger Pharmacy Generic Formulary                 |
|                                 |              | Scott and White Senior Care/Vital Traditions                                | Kroger Prescription Plans                         |
|                                 |              | SecureRx Option 3                                                           | LA Care Marketplace HIX CA                        |
|                                 |              | SecureRx PDP                                                                | Land of Lincoln HIX IL                            |
|                                 |              | Security Health Plan AllyRx                                                 | LDI Pharmacy Benefit Management                   |
|                                 |              | Security Health Plan Medicare                                               | Magellan Rx Precision                             |
|                                 |              | SelectHealth Advantage                                                      | Magellan Rx Standard Formulary                    |
|                                 |              | Senior Dimensions Greater Nevada                                            | Magellan Rx Standard Plus                         |
|                                 |              | Senior Dimensions Southern Nevada                                           | Magic Steel Corporation                           |
|                                 |              | Senior Whole Health Massachusetts                                           | Mail Handlers Benefit Plan                        |
|                                 |              | Senior Whole Health New York                                                | Maine Community Health Options                    |
|                                 |              | SeniorBlue and SeniorBlue PPO                                               | MAPFRE Formulary                                  |
|                                 |              | SeniorCare Wisconsin                                                        | Maryland Physicians Care                          |
|                                 |              | Sharp Advantage Select/SelectPlus                                           | MaxCare                                           |
|                                 |              | Sharp SecureHorizons Plan by UnitedHealthcare                               | Maxor Plus Three Tier                             |
|                                 |              | Sierra Spectrum                                                             | Maxor Plus Two Tier                               |
|                                 |              | Signature Advantage                                                         | Mayo Clinic 2 Tier                                |
|                                 |              | SilverScript Choice                                                         | Mayo Clinic 3 Tier                                |
|                                 |              | SilverScript Copper 4 Tier                                                  | Mayo Health Employee Formulary                    |
|                                 |              | SilverScript Platinum 4 Tier                                                | McLaren Health Plan Commercial                    |
|                                 |              | SilverScript Plus                                                           | McLaren Health Plan HIX MI                        |



| <b>395 MEDICAID FORMULARIES</b> | <b>State</b> | <b>656 MEDICARE ADVANTAGE FORMULARIES</b>                         | <b>870 COMMERCIAL FORMULARIES</b>                                      |
|---------------------------------|--------------|-------------------------------------------------------------------|------------------------------------------------------------------------|
|                                 |              | Simply Healthcare Medicare                                        | MDWise HIX                                                             |
|                                 |              | SmartSaver Rx PDP                                                 | Medica Advanced Control Specialty                                      |
|                                 |              | Soundpath Health Medicare                                         | Medica HIX                                                             |
|                                 |              | South Country Health Alliance AbilityCare and SeniorCare Complete | Medica SelectCare Two Tier                                             |
|                                 |              | StableView Health Medicare                                        | Medica Two Tier                                                        |
|                                 |              | Stanford Health Care Advantage                                    | Medical Associates Health Plan                                         |
|                                 |              | SummaCare Medicare Topaz, Ruby, Sapphire and Emerald              | Medical Mutual of Ohio                                                 |
|                                 |              | Sunshine Health Advantage - Miami-Dade                            | Medical Mutual of Ohio HIX                                             |
|                                 |              | Sunshine Health Advantage SNP                                     | MedImpact Portfolio                                                    |
|                                 |              | Sunshine Health Medicare Advantage HMO                            | MedImpact Select                                                       |
|                                 |              | Superior HealthPlan Advantage                                     | MedTrak National                                                       |
|                                 |              | Superior HealthPlan Medicare Advantage                            | MercyCare Health Plans HIX WI                                          |
|                                 |              | Superior HealthPlan STAR+PLUS MMP                                 | Meridian Choice HIX MI                                                 |
|                                 |              | SWH Whole Health FIDA Plan                                        | Metalcraft of Mayville                                                 |
|                                 |              | Symphonix Value Rx                                                | MetroPlus Health Plan HIX NY                                           |
|                                 |              | Texan Plus Houston/Beaumont                                       | Minuteman Health HIX MA                                                |
|                                 |              | TexanPlus Star                                                    | Mississippi State and School Employees Health Plan                     |
|                                 |              | The Health Plan SecureCare                                        | Moda Health Large Groups                                               |
|                                 |              | The Health Plan SecureCare SNP                                    | MODA Health Plan                                                       |
|                                 |              | The Health Plan SecureChoice                                      | Moda Health Plan of Oregon HIX                                         |
|                                 |              | Transamerica MedicareRx Classic                                   | Moda Health Plan Small Group Formulary                                 |
|                                 |              | Tribute Health Plan of Arkansas                                   | Moda Health Preferred Drug List                                        |
|                                 |              | Tribute Health Plan of Oklahoma                                   | Moda Health Preferred Drug List of Alaska HIX                          |
|                                 |              | Trillium Advantage Pioneer Rx PPO                                 | Molina Healthcare of California HIX                                    |
|                                 |              | Trillium Advantage Special Needs Plans                            | Molina Healthcare of Florida HIX                                       |
|                                 |              | Triple-S Advantage Medicare Optimo Plus                           | Molina Healthcare of Michigan HIX                                      |
|                                 |              | Triple-S Advantage Medicare Platino Plus, Ultra, and Advance      | Molina Healthcare of New Mexico HIX                                    |
|                                 |              | Triple-S Advantage Medicare Royal, Vital Plus, Royal Plus         | Molina Healthcare of Ohio HIX                                          |
|                                 |              | Tufts Health Plan Medicare Employer Group PDP                     | Molina Healthcare of Texas HIX                                         |
|                                 |              | Tufts Health Plan Medicare Preferred                              | Molina Healthcare of Utah HIX                                          |
|                                 |              | Tufts Health Unify MMP                                            | Molina Healthcare of Washington HIX                                    |
|                                 |              | Tufts Medicare Employer Group                                     | Molina Healthcare of Wisconsin HIX                                     |
|                                 |              | Tufts Medicare Preferred Senior Care Options                      | Montana Health Coop HIX MT                                             |
|                                 |              | UCare EssentiaCare                                                | Montana State Fund                                                     |
|                                 |              | UCare for Seniors Essentials Rx, Value Plus, Prime and Classic    | Montgomery County Public Schools                                       |
|                                 |              | UCare Minnesota Senior Health Options (MSHO)                      | Mountain Health Coop HIX                                               |
|                                 |              | Ultimate Health Plans                                             | MVP Health Care HIX NY                                                 |
|                                 |              | United American Part D Enhanced                                   | MVP Health Care HIX VT                                                 |
|                                 |              | United American Part D Essential                                  | MVP Health Plan                                                        |
|                                 |              | United American Part D Select                                     | MVP Health Plan Formulary                                              |
|                                 |              | UnitedHealthCare Advantage Four Tier                              | MVP Option and Option Family                                           |
|                                 |              | UnitedHealthCare Advantage Three Tier                             | MyPriority MI 5 Tier HIX                                               |
|                                 |              | UnitedHealthcare Assisted Living Plan                             | MyPriority MI 6 Tier HIX                                               |
|                                 |              | UnitedHealthcare Chronic Complete                                 | Nashville Metro Government                                             |
|                                 |              | UnitedHealthcare Connected for MyCare Ohio MMP                    | National Benefit & Pension Fund 1199                                   |
|                                 |              | UnitedHealthcare Connected MMP                                    | National Pharmaceutical Services/<br>Pharmaceutical Technologies, Inc. |
|                                 |              | UnitedHealthcare Dual Complete Focus                              | Navitus Open Formulary                                                 |
|                                 |              | UnitedHealthcare Dual Complete LP - FL                            | Navitus Select                                                         |
|                                 |              | UnitedHealthcare Dual Complete LP1                                | Navitus Traditional Formulary                                          |
|                                 |              | UnitedHealthcare Dual Complete ONE                                | Neighborhood Health Plan MA HIX                                        |
|                                 |              | UnitedHealthcare Dual Complete RP ONE                             | Neighborhood Health Plan of RI HIX                                     |

| <b>395 MEDICAID FORMULARIES</b> | <b>State</b> | <b>656 MEDICARE ADVANTAGE FORMULARIES</b>                                    | <b>870 COMMERCIAL FORMULARIES</b>                                 |
|---------------------------------|--------------|------------------------------------------------------------------------------|-------------------------------------------------------------------|
|                                 |              | UnitedHealthcare Dual Complete/LP                                            | Network Health Plan WI HIX                                        |
|                                 |              | UnitedHealthcare Dual Complete/RP PPO-SNP                                    | New Mexico Health Connections HIX NM                              |
|                                 |              | UnitedHealthcare MedicareComplete Choice/Choice Plan 1, 3, & 4               | New York Hotel Trades Council/Hotel Association of New York City  |
|                                 |              | UnitedHealthcare MedicareComplete Focus                                      | Nippon Life                                                       |
|                                 |              | UnitedHealthcare MedicareComplete Plan 1-3                                   | North Carolina State Health Plan for Teachers and State Employees |
|                                 |              | UnitedHealthcare MedicareDirect Rx                                           | North Shore LIJ CareConnect HIX NY                                |
|                                 |              | UnitedHealthcare MedicareRx for Groups                                       | Northwest Pharmacy Services                                       |
|                                 |              | UnitedHealthcare Nursing Home Plan                                           | Ohio Bureau of Workers' Compensation                              |
|                                 |              | UnitedHealthCare Oxford Connecticut Advantage Three Tier                     | Ohio Public Employees Retirement System (OPERS) Non-Medicare      |
|                                 |              | UnitedHealthcare Oxford Health Plan NJ/NY Advantage Three Tier               | Optima Health Four Tier                                           |
|                                 |              | UnitedHealthcare Plan River Valley - Advantage 3 Tier                        | Optima Health Plan HIX VA                                         |
|                                 |              | UnitedHealthcare Plan River Valley - Advantage 4 Tier                        | OptumRx Generic-Centric                                           |
|                                 |              | UnitedHealthcare Senior Care Options                                         | OptumRx Premium Highly Managed                                    |
|                                 |              | UnitedHealthcare The Villages MedicareComplete 1-2                           | OptumRx Premium Highly Managed with UM                            |
|                                 |              | UnitedHealthcare The Villages MedicareComplete 2                             | OptumRx Select Covered                                            |
|                                 |              | University Care Advantage                                                    | OptumRx Select Covered with Focused UM                            |
|                                 |              | University of Maryland Health Advantage                                      | OptumRx Select Highly Managed                                     |
|                                 |              | UPMC Advantage Choice                                                        | OptumRx Select Managed                                            |
|                                 |              | UPMC for Life Dual                                                           | OptumRx Select Managed with Focused UM                            |
|                                 |              | UPMC For You                                                                 | Oregon Educators Benefit Board                                    |
|                                 |              | UPMC Medicare Advantage                                                      | Oregons Health CO-OP HIX                                          |
|                                 |              | UPMC Medicare Advantage SNP                                                  | Oscar CA HIX                                                      |
|                                 |              | UPMC Open Choice                                                             | Oscar HIX NY                                                      |
|                                 |              | UPMC Value Choice                                                            | Oscar NJ HIX                                                      |
|                                 |              | UPMC Your Choice                                                             | Oscar TX HIX                                                      |
|                                 |              | Upper Peninsula Health Plan                                                  | Oshkosh Corporation/JLG Industries                                |
|                                 |              | Upper Peninsula Health Plan Advantage                                        | PA Employees Benefit Trust Fund                                   |
|                                 |              | Upper Peninsula Health Plan MI Health Link MMP                               | PacificSource HIX ID                                              |
|                                 |              | Upper Peninsula Health Plan Plus                                             | PacificSource HIX MT                                              |
|                                 |              | UPREHS Prime Medicare Part D                                                 | PacificSource HIX OR                                              |
|                                 |              | UW Health Senior Preferred                                                   | Paramount Healthcare                                              |
|                                 |              | Vantage Medicare Plans                                                       | Paramount Healthcare PPO                                          |
|                                 |              | Vibra Health Plan Enhanced                                                   | Paramount Individual Exchange and Essential (HIX OH)              |
|                                 |              | Vibra Health Plan Essential                                                  | Partners Community Healthcare                                     |
|                                 |              | VillageCareMAX Full Advantage FIDA Plan                                      | PBM Plus                                                          |
|                                 |              | VillageCareMAX Medicare Health Advantage (HMO SNP)                           | Perdue Farms                                                      |
|                                 |              | VillageHealth Medicare                                                       | Pfizer Prescription Drug Program                                  |
|                                 |              | Virginia Premier CompleteCare MMP                                            | Phoenix Choice Health Plan HIX                                    |
|                                 |              | VIVA Medicare Extra Value                                                    | Physicians Health Plan of Michigan                                |
|                                 |              | VIVA Medicare Plus/Premier/Me                                                | Physicians Health Plan of Michigan HIX                            |
|                                 |              | VNSNY CHOICE FIDA Complete                                                   | Physicians Health Plan of Northern Indiana                        |
|                                 |              | VNSNY CHOICE Medicare Classic, Preferred, Total, & Maximum                   | Physicians Health Plan of Northern Indiana HIX                    |
|                                 |              | VNSNY Choice Medicare Enhanced & Ultra                                       | Physicians Plus Five Tier Premier                                 |
|                                 |              | WellCare/Ohana/Liberty/Value/Access/Dividend/Essential/Choice/Plus/Preferred | Physicians Plus Four Tier Legacy                                  |
|                                 |              | WellCare- Access-Liberty-Reserve-Rx-Select-Value                             | Physicians Plus Three Tier Legacy                                 |

| <b>395 MEDICAID FORMULARIES</b> | <b>State</b> | <b>656 MEDICARE ADVANTAGE FORMULARIES</b> | <b>870 COMMERCIAL FORMULARIES</b>                 |
|---------------------------------|--------------|-------------------------------------------|---------------------------------------------------|
|                                 |              | WellCare Advocate Complete FIDA           | Physicians Plus Two Tier Legacy                   |
|                                 |              | WellCare Classic                          | Piedmont Community HealthCare HIX                 |
|                                 |              | WellCare Classic & Extra                  | Pinal County Employee Benefit Trust               |
|                                 |              | WellCare Essential Georgia                | Pinnacle RxSolutions Performance Drug List        |
|                                 |              | WellCare of Georgia                       | PreferredOne Formulary                            |
|                                 |              | WellCare of Kentucky                      | Premera Blue Cross Value-Based                    |
|                                 |              | WellCare of New Jersey                    | Premera Generics Only                             |
|                                 |              | WellCare of New York Healthy Choice       | Premera HIX X1                                    |
|                                 |              | WellCare of South Carolina                | Premera HIX X3                                    |
|                                 |              | WellCare Value/ Choice Georgia            | Premera HIX X4                                    |
|                                 |              | Wisconsin Physician Services Medicare     | Premera Incentive 2-Tier                          |
|                                 |              | WVA Senior Advantage HMO-SNP              | Premera Incentive 4-Tier                          |
|                                 |              |                                           | Premera-Select                                    |
|                                 |              |                                           | Premier Health Business Value                     |
|                                 |              |                                           | Premier HealthOne HIX                             |
|                                 |              |                                           | Presbyterian Health Plan Centennial Care          |
|                                 |              |                                           | Presbyterian Health Plan FEHBP                    |
|                                 |              |                                           | Presbyterian Health Plan Group 4 Tier             |
|                                 |              |                                           | Presbyterian Health Plan HIX NM                   |
|                                 |              |                                           | Prevea360 HIX WI                                  |
|                                 |              |                                           | PrimeChoice Accord 3 Tier                         |
|                                 |              |                                           | Prince Manufacturing Formulary                    |
|                                 |              |                                           | Priority Health Michigan Commercial Formulary     |
|                                 |              |                                           | ProCare Rx                                        |
|                                 |              |                                           | Prominence Health Plan                            |
|                                 |              |                                           | Prominence Health Plan Nevada                     |
|                                 |              |                                           | Prominence Health Plan Nevada HIX                 |
|                                 |              |                                           | Prominence Health Plan Texas                      |
|                                 |              |                                           | Providence Health Plan Formulary A                |
|                                 |              |                                           | Providence Health Plan Formulary D                |
|                                 |              |                                           | Providence Health Plan Formulary G                |
|                                 |              |                                           | Public Education Employees' Health Insurance Plan |
|                                 |              |                                           | Public Employees Health Program (PEHP)            |
|                                 |              |                                           | QualChoice Basic                                  |
|                                 |              |                                           | QualChoice Enhanced                               |
|                                 |              |                                           | QualChoice Essential Formulary HIX                |
|                                 |              |                                           | QualChoice FEHBP                                  |
|                                 |              |                                           | Raytheon                                          |
|                                 |              |                                           | Regence BlueShield Essential WA HIX               |
|                                 |              |                                           | Regence Commercial                                |
|                                 |              |                                           | Riverside Health                                  |
|                                 |              |                                           | Rock County Formulary (Plan 2)                    |
|                                 |              |                                           | Rock County Formulary (Plan 4)                    |
|                                 |              |                                           | Rock County Formulary (Plan 6)                    |
|                                 |              |                                           | Rocky Mountain Health Plan                        |
|                                 |              |                                           | Rocky Mountain Health/ Good Health                |
|                                 |              |                                           | Rural Arizona Group Health Trust                  |
|                                 |              |                                           | Samaritan Choice Plan                             |
|                                 |              |                                           | San Luis Valley HMO Colorado Two Tier             |
|                                 |              |                                           | Sanford Health Plan Commercial 3 Tier             |
|                                 |              |                                           | Sanford Health Plan HIX                           |
|                                 |              |                                           | Santa Clara County Employee                       |
|                                 |              |                                           | Sargento Foods                                    |
|                                 |              |                                           | Sartori Foods                                     |
|                                 |              |                                           | Sav-Rx                                            |
|                                 |              |                                           | Scheurer Hospital Formulary                       |
|                                 |              |                                           | School District of Cudahy                         |
|                                 |              |                                           | Scott & White Health Plan 3 Tier with Specialty   |

| <b>395 MEDICAID FORMULARIES</b> | <b>State</b> | <b>656 MEDICARE ADVANTAGE FORMULARIES</b> | <b>870 COMMERCIAL FORMULARIES</b>               |
|---------------------------------|--------------|-------------------------------------------|-------------------------------------------------|
|                                 |              |                                           | Scott & White Health Plan 4 Tier with Specialty |
|                                 |              |                                           | Scott & White Health Plan HIX                   |
|                                 |              |                                           | Scott and White Health Plan ERS                 |
|                                 |              |                                           | ScripNet Worker's Compensation Drug List        |
|                                 |              |                                           | Script Care                                     |
|                                 |              |                                           | ScriptGuideRx/4D                                |
|                                 |              |                                           | Seaver Associates Leasing                       |
|                                 |              |                                           | Security Health Plan of Wisconsin               |
|                                 |              |                                           | Security Health Plan of Wisconsin HIX           |
|                                 |              |                                           | SelectHealth RxCore Idaho HIX                   |
|                                 |              |                                           | SelectHealth RxCore Utah                        |
|                                 |              |                                           | SelectHealth RxSelect Idaho                     |
|                                 |              |                                           | SelectHealth RxSelect Utah                      |
|                                 |              |                                           | Self-Insured Schools of California (SISC)       |
|                                 |              |                                           | Serve You Select                                |
|                                 |              |                                           | Serve You Standard                              |
|                                 |              |                                           | Sharp Health Plan Four Tier                     |
|                                 |              |                                           | Sharp Health Plan Four Tier HIX                 |
|                                 |              |                                           | Sharp Health Plan Three Tier                    |
|                                 |              |                                           | Sierra Health and Life Four Tier                |
|                                 |              |                                           | Sierra Health and Life Three Tier               |
|                                 |              |                                           | SignatureScripts from OhioHealth Group          |
|                                 |              |                                           | SIHO HIX                                        |
|                                 |              |                                           | Southeastern Indiana Health Organization (SIHO) |
|                                 |              |                                           | State Employees of Montana Formulary            |
|                                 |              |                                           | State of Arizona Employees                      |
|                                 |              |                                           | State of Connecticut Employee Formulary         |
|                                 |              |                                           | State of Florida Employee Prescription Plan     |
|                                 |              |                                           | State of Louisiana - Office of Group Benefits   |
|                                 |              |                                           | State of Maryland Employees                     |
|                                 |              |                                           | State of Michigan Employees                     |
|                                 |              |                                           | State of New Jersey Employees                   |
|                                 |              |                                           | State of New York PICA Program                  |
|                                 |              |                                           | State of South Dakota Employees                 |
|                                 |              |                                           | State of Tennessee ParTNers for Health          |
|                                 |              |                                           | State of WI Group Health                        |
|                                 |              |                                           | SummaCare                                       |
|                                 |              |                                           | SummaCare HIX OH                                |
|                                 |              |                                           | Sutter Health                                   |
|                                 |              |                                           | Teck American Incorporated                      |
|                                 |              |                                           | The Health Plan of Upper Ohio Valley            |
|                                 |              |                                           | Thedacare                                       |
|                                 |              |                                           | Total Care                                      |
|                                 |              |                                           | Total Health Care 3 Tier                        |
|                                 |              |                                           | Total Health Care MI HIX                        |
|                                 |              |                                           | TREK Bicycle Corporation                        |
|                                 |              |                                           | Trillium Vital Fit Standard HIX OR              |
|                                 |              |                                           | Triple-S Commercial                             |
|                                 |              |                                           | Triple-S FEHBP                                  |
|                                 |              |                                           | TRS-ActiveCare                                  |
|                                 |              |                                           | TRUSTED Health Plan                             |
|                                 |              |                                           | Tufts Health Direct HIX                         |
|                                 |              |                                           | Tufts Health Plan                               |
|                                 |              |                                           | Tufts Health Plan HIX                           |
|                                 |              |                                           | Tufts Health Plan Rhode Island                  |
|                                 |              |                                           | UAW Retiree Medical Benefits Trust              |

| <b>395 MEDICAID FORMULARIES</b> | <b>State</b> | <b>656 MEDICARE ADVANTAGE FORMULARIES</b> | <b>870 COMMERCIAL FORMULARIES</b>                        |
|---------------------------------|--------------|-------------------------------------------|----------------------------------------------------------|
|                                 |              |                                           | UCare Choice HIX MN                                      |
|                                 |              |                                           | Unicare State Indemnity Plan                             |
|                                 |              |                                           | Uniform Medical Plan                                     |
|                                 |              |                                           | Union Pacific Railroad Employees Health System (UPREHS)  |
|                                 |              |                                           | United Federation of Teachers Welfare Fund               |
|                                 |              |                                           | United Healthcare California Advantage HIX               |
|                                 |              |                                           | United Mine Workers of America Health & Retirement Funds |
|                                 |              |                                           | UnitedHealthcare 3 Tier Advantage HIX - MA               |
|                                 |              |                                           | UnitedHealthcare 3 Tier Advantage HIX - NY               |
|                                 |              |                                           | UnitedHealthcare 3 Tier Traditional HIX - CT             |
|                                 |              |                                           | UnitedHealthcare 3 Tier Traditional HIX - NJ             |
|                                 |              |                                           | UnitedHealthcare 4 Tier Advantage HIX - TN               |
|                                 |              |                                           | UnitedHealthcare 4 Tier Advantage HIX AL                 |
|                                 |              |                                           | UnitedHealthcare 4 Tier Advantage HIX AR                 |
|                                 |              |                                           | UnitedHealthcare 4 Tier Advantage HIX FL                 |
|                                 |              |                                           | UnitedHealthcare 4 Tier Advantage HIX GA                 |
|                                 |              |                                           | UnitedHealthcare 4 Tier Advantage HIX LA                 |
|                                 |              |                                           | UnitedHealthcare 4 Tier Advantage HIX MD                 |
|                                 |              |                                           | UnitedHealthcare 4 Tier Advantage HIX MS                 |
|                                 |              |                                           | UnitedHealthcare 4 Tier Advantage HIX NC                 |
|                                 |              |                                           | UnitedHealthcare 4 Tier Advantage HIX RI                 |
|                                 |              |                                           | UnitedHealthcare 4 Tier Advantage HIX SC                 |
|                                 |              |                                           | UnitedHealthcare 4 Tier Essential HIX KS                 |
|                                 |              |                                           | UnitedHealthcare 4 Tier Essential HIX KY                 |
|                                 |              |                                           | UnitedHealthcare 4 Tier Essential HIX NE                 |
|                                 |              |                                           | UnitedHealthcare 4 Tier Essential HIX OK                 |
|                                 |              |                                           | UnitedHealthcare 4 Tier Essential HIX WA                 |
|                                 |              |                                           | UnitedHealthcare 4 Tier Essential IA                     |
|                                 |              |                                           | UnitedHealthcare 4 Tier Traditional HIX AR               |
|                                 |              |                                           | UnitedHealthCare California SignatureValue 2 Tier        |
|                                 |              |                                           | UnitedHealthCare California SignatureValue 3 Tier        |
|                                 |              |                                           | UnitedHealthcare Commercial 3 Tier                       |
|                                 |              |                                           | UnitedHealthcare Essential HIX - VA                      |
|                                 |              |                                           | UnitedHealthcare Essential HIX AZ                        |
|                                 |              |                                           | UnitedHealthcare Essential HIX CO                        |
|                                 |              |                                           | UnitedHealthcare Essential HIX IL                        |
|                                 |              |                                           | UnitedHealthcare Essential HIX IN                        |
|                                 |              |                                           | UnitedHealthcare Essential HIX MD                        |
|                                 |              |                                           | UnitedHealthcare Essential HIX MI                        |
|                                 |              |                                           | UnitedHealthcare Essential HIX MO                        |
|                                 |              |                                           | UnitedHealthcare Essential HIX OH                        |

| <b>395 MEDICAID FORMULARIES</b> | <b>State</b> | <b>656 MEDICARE ADVANTAGE FORMULARIES</b> | <b>870 COMMERCIAL FORMULARIES</b>                                |
|---------------------------------|--------------|-------------------------------------------|------------------------------------------------------------------|
|                                 |              |                                           | UnitedHealthcare Essential HIX PA                                |
|                                 |              |                                           | UnitedHealthcare Essential HIX TX                                |
|                                 |              |                                           | UnitedHealthcare Essential HIX WI                                |
|                                 |              |                                           | UnitedHealthcare FEHBP - Choice Plus Advanced                    |
|                                 |              |                                           | UnitedHealthcare FEHBP - MD IPA                                  |
|                                 |              |                                           | UnitedHealthcare FEHBP California                                |
|                                 |              |                                           | UnitedHealthcare FEHBP of the Midwest                            |
|                                 |              |                                           | UnitedHealthcare FEHBP Texas                                     |
|                                 |              |                                           | UnitedHealthcare Golden Rule Four Tier                           |
|                                 |              |                                           | UnitedHealthcare Golden Rule Three Tier                          |
|                                 |              |                                           | UnitedHealthcare of California SignatureValue 4 Tier             |
|                                 |              |                                           | UnitedHealthCare Oxford Connecticut Traditional Three Tier       |
|                                 |              |                                           | UnitedHealthCare Oxford Health Plan NJ/NY Traditional Three Tier |
|                                 |              |                                           | UnitedHealthcare Plan River Valley - Traditional                 |
|                                 |              |                                           | UnitedHealthCare SignatureValue 3 Tier                           |
|                                 |              |                                           | UnitedHealthcare SignatureValue Open                             |
|                                 |              |                                           | UnitedHealthcare SignatureValue OR                               |
|                                 |              |                                           | UnitedHealthcare SignatureValue TX                               |
|                                 |              |                                           | UnitedHealthcare SignatureValue WA                               |
|                                 |              |                                           | UnitedHealthcare Traditional Four Tier                           |
|                                 |              |                                           | UnitedHealthcare Traditional Three Tier                          |
|                                 |              |                                           | Unity Health Plan Closed WI HIX                                  |
|                                 |              |                                           | Unity Health Plan Open WI HIX                                    |
|                                 |              |                                           | Unity Health Plan Standard Four Tier                             |
|                                 |              |                                           | Unity Health Plan Standard Three Tier                            |
|                                 |              |                                           | Univera Healthcare NY HIX                                        |
|                                 |              |                                           | Universal Rx Focus Drug Formulary                                |
|                                 |              |                                           | Universal Rx Outcomes Drug Formulary                             |
|                                 |              |                                           | University Health Alliance 3 Tier                                |
|                                 |              |                                           | University Hospitals                                             |
|                                 |              |                                           | University of Arkansas 3 Tier                                    |
|                                 |              |                                           | University of Colorado                                           |
|                                 |              |                                           | University of KY 3 TIER                                          |
|                                 |              |                                           | University of Michigan Formulary                                 |
|                                 |              |                                           | University of Minnesota UPlan Formulary                          |
|                                 |              |                                           | University of Toledo                                             |
|                                 |              |                                           | University of Utah HIX                                           |
|                                 |              |                                           | UPMC Your Choice For FEHBP                                       |
|                                 |              |                                           | US Bank                                                          |
|                                 |              |                                           | Valley Health Plan HIX CA                                        |
|                                 |              |                                           | Vanderbilt University                                            |
|                                 |              |                                           | Vantage Health Plan LA                                           |
|                                 |              |                                           | Ventegra Preferred Formulary                                     |
|                                 |              |                                           | Ventegra Premium Formulary                                       |
|                                 |              |                                           | Ventegra Premium Plus Formulary                                  |
|                                 |              |                                           | Ventura County Health Care Plan                                  |
|                                 |              |                                           | Virginia Premier                                                 |
|                                 |              |                                           | Virginia Premier Elite                                           |
|                                 |              |                                           | VIVA Essential Health Benefit Formulary                          |
|                                 |              |                                           | VIVA Essential Health Benefit Formulary with Value Generics      |
|                                 |              |                                           | VIVA Health Advanced Formulary                                   |
|                                 |              |                                           | VIVA Health Advanced Formulary with Value Generics               |
|                                 |              |                                           | Viva Health Alabama                                              |
|                                 |              |                                           | Viva Health UAB                                                  |
|                                 |              |                                           | VRx Commercial Formulary                                         |

| <b>395 MEDICAID FORMULARIES</b> | <b>State</b> | <b>656 MEDICARE ADVANTAGE FORMULARIES</b> | <b>870 COMMERCIAL FORMULARIES</b>                |
|---------------------------------|--------------|-------------------------------------------|--------------------------------------------------|
|                                 |              |                                           | Walmart Associates Formulary                     |
|                                 |              |                                           | Walmart Generics Program                         |
|                                 |              |                                           | WellCare of Kentucky HIX                         |
|                                 |              |                                           | WellCare of New York HIX                         |
|                                 |              |                                           | WellDyneRx Formulary                             |
|                                 |              |                                           | Wellmark Blue Rx Preferred 3 Tier with Specialty |
|                                 |              |                                           | Wellmark Blue Rx Preferred 4 Tier with Specialty |
|                                 |              |                                           | West Virginia PEIA                               |
|                                 |              |                                           | Western Health Advantage Commercial              |
|                                 |              |                                           | Western Health Advantage HIX CA                  |
|                                 |              |                                           | Wexford Health Corporate Formulary               |
|                                 |              |                                           | Whirlpool Corporation                            |
|                                 |              |                                           | Wisconsin Diagnostic Laboratories                |
|                                 |              |                                           | Wisconsin Physician Services                     |
|                                 |              |                                           | Yale University Health Plan                      |
|                                 |              |                                           | Zoom Health OR HIX                               |
